# 1 **Translational mapping of spatially resolved transcriptomes in human** 2 **and mouse pulmonary fibrosis**

3

4 Lovisa Franzén<sup>1,2,#</sup>, Martina Olsson Lindvall<sup>1,#</sup>, Michael Hühn<sup>3</sup>, Victoria Ptasinski<sup>1</sup>, Laura Setyo<sup>4</sup>, Benjamin  
5 Keith<sup>5</sup>, Astrid Collin<sup>6</sup>, Steven Oag<sup>6</sup>, Thomas Volckaert<sup>7</sup>, Annika Borde<sup>7</sup>, Joakim Lundeberg<sup>2</sup>, Julia Lindgren<sup>8</sup>,  
6 Graham Belfield<sup>8</sup>, Sonya Jackson<sup>9</sup>, Anna Ollerstam<sup>1</sup>, Marianna Stamou<sup>1,§</sup>, Patrik L Ståhl<sup>2,§</sup>, Jorrit J Hornberg<sup>1</sup>

7

8 1. Safety Sciences, Clinical Pharmacology & Safety Sciences, R&D, AstraZeneca, Gothenburg, Sweden

9 2. Department of Gene Technology, KTH Royal Institute of Technology, Science for Life Laboratory,  
10 Stockholm, Sweden

11 3. Translational Science and Experimental Medicine, Research and Early Development, Respiratory &  
12 Immunology, BioPharmaceuticals R&D, AstraZeneca, Gothenburg, Sweden

13 4. Pathology, Clinical Pharmacology & Safety Sciences, R&D, AstraZeneca, Cambridge, UK

14 5. Quantitative Biology, Discovery Sciences, R&D, AstraZeneca, Gothenburg, Sweden

15 6. Animal Science & Technologies, Clinical Pharmacology & Safety Sciences, R&D, AstraZeneca,  
16 Gothenburg, Sweden

17 7. Bioscience In Vivo, Research and Early Development, Respiratory & Immunology, BioPharmaceuticals  
18 R&D, AstraZeneca, Gothenburg, Sweden

19 8. Translational Genomics, Centre for Genomics Research, Discovery Sciences, R&D, AstraZeneca,  
20 Gothenburg, Sweden

21 9. Late-Stage Development, Respiratory & Immunology, BioPharmaceuticals R&D, AstraZeneca, Gothenburg,  
22 Sweden

23

24 # Equal contribution

25 § Correspondence to: Marianna Stamou, [marianna.stamou@astrazeneca.com](mailto:marianna.stamou@astrazeneca.com); Patrik L Ståhl,  
26 [patrik.stahl@scilifelab.se](mailto:patrik.stahl@scilifelab.se)

27

28

29 **Abstract**

30 Idiopathic pulmonary fibrosis (IPF) is a progressive lung disease with poor prognosis and limited treatment  
31 options. Efforts to identify effective treatments are thwarted by limited understanding of IPF pathogenesis and  
32 poor translatability of available preclinical models. To address these limitations, we generated spatially  
33 resolved transcriptome maps of human IPF and bleomycin-induced mouse lung fibrosis. We uncovered  
34 distinct fibrotic niches in the IPF lung, characterized by aberrant alveolar epithelial cells in a microenvironment  
35 dominated by TGF $\beta$  signaling alongside factors such as p53 and ApoE. We also identified a clear divergence  
36 between the arrested alveolar regeneration in the IPF fibrotic niches, and the active tissue repair in the acutely  
37 fibrotic mouse lung. Our study offers in-depth insights into the IPF transcriptional landscape and proposes  
38 alveolar regeneration as a promising therapeutic strategy for IPF.

39 Idiopathic pulmonary fibrosis (IPF) is a chronic lung disease characterized by progressive and irreversible  
40 scarring of the lung. Treatment options are limited, and the development of new therapies is impeded by  
41 incomplete understanding of disease pathogenesis and translatability limitations of available pre-clinical  
42 models. Recent advances into mechanistic understanding of IPF pathogenesis reveal complex gene-  
43 environment interactions as key pathophysiological drivers<sup>1-3</sup>.

44 Single-cell studies have revealed IPF-associated cell states, including atypical epithelial cells, fibroblasts<sup>4,5</sup>,  
45 and pro-fibrotic alveolar macrophages<sup>6,7</sup>. Interestingly, a novel KRT5-/KRT17+ aberrant basaloid (AbBa)  
46 epithelial cell population has been independently identified in multiple studies<sup>4,5,8,9</sup>, expressing epithelial,  
47 basal, and mesenchymal markers and genes related to senescence and extracellular matrix (ECM)  
48 production. These cells likely originate from alveolar type 2 (AT2) or club cells<sup>4,5,9,10</sup>, but their role in the fibrotic  
49 microenvironment remains elusive. A closely related Krt8+ alveolar differentiation intermediate (ADI) cell  
50 population is present in the widely used mouse model of bleomycin (BLM)-induced lung fibrosis<sup>11-13</sup>, which, in  
51 contrast to the IPF lung, features relatively rapid inflammatory onset, epithelial regeneration, and fibrosis  
52 resolution<sup>14,15</sup>.

53 Although recent single-cell (sc) RNA-seq studies have significantly advanced our understanding of the IPF  
54 lung cellular composition<sup>4-7,16-18</sup>, they lack insights into tissue architecture and cellular interplay in a spatial  
55 context. Spatially resolved transcriptomics (SRT) enables RNA profiling of intact tissue<sup>19-22</sup> and can illuminate  
56 dynamic cellular interactions in lung tissue<sup>23-25</sup>. However, a transcriptome-wide map of extensive areas of the  
57 fibrotic lung is currently missing.

58 Here, we applied SRT to map the fibrotic lung landscape in human IPF and the BLM mouse model. We  
59 integrated SRT with scRNA-seq data to characterize the AbBa cell microenvironment and delineate the  
60 dynamic crosstalk between alveolar epithelial cells, myofibroblasts, fibroblasts, and pro-fibrotic macrophages.  
61 These first-of-its-kind spatial atlases broaden our understanding of the IPF cellular interplay and unveil key  
62 convergent and divergent pathways in human IPF and the BLM mouse model.

## 63 **Results**

### 64 **Spatial transcriptomics of healthy and IPF lungs**

65 We generated transcriptome-wide spatial profiles of freshly frozen human lung biopsies from four IPF patients  
66 (IPF 1-4, collected during lung transplantation) and four subjects with no known lung disease (healthy  
67 controls; HC 1-4, "B0", collected post-mortem) using the Visium Spatial Gene Expression platform (**Fig. 1a,b**).  
68 For each IPF patient, three biopsies ("B1", "B2", "B3") reflecting increasing extent of fibrotic injury within the  
69 same donor were selected (**Fig. 1a**).

70 We analyzed an average of around 4000 spots (each spot representing a transcriptome of the tissue covering  
71 the spot) per tissue section (**Fig. 1c (i)**), capturing an average of >1500 unique genes per spot (**Fig. 1c (ii)**).  
72 We observed a higher average number of genes per spot and transcript count levels in IPF samples  
73 compared to HC, likely due to disease-associated differences in cellular density between the samples. A  
74 pseudo-bulk differential expression analysis (DEA) between IPF and HC samples identified a total of 1469  
75 differentially expressed genes (DEGs) (**Fig. 1c (iii)**), including genes associated with fibroblasts, previously

76 reported to be upregulated in IPF (*FNDC1*, *COL10A1*, *THY1*)<sup>26</sup>, as well as matrix metalloproteinases  
 77 (MMPs)<sup>27</sup> and genes involved in IPF-associated signalling pathways (*SFRP2*, *WNT10A*, *TGFBI*)<sup>28,29</sup>. Many of  
 78 the upregulated genes in IPF samples mapped to areas of remodelled tissue.

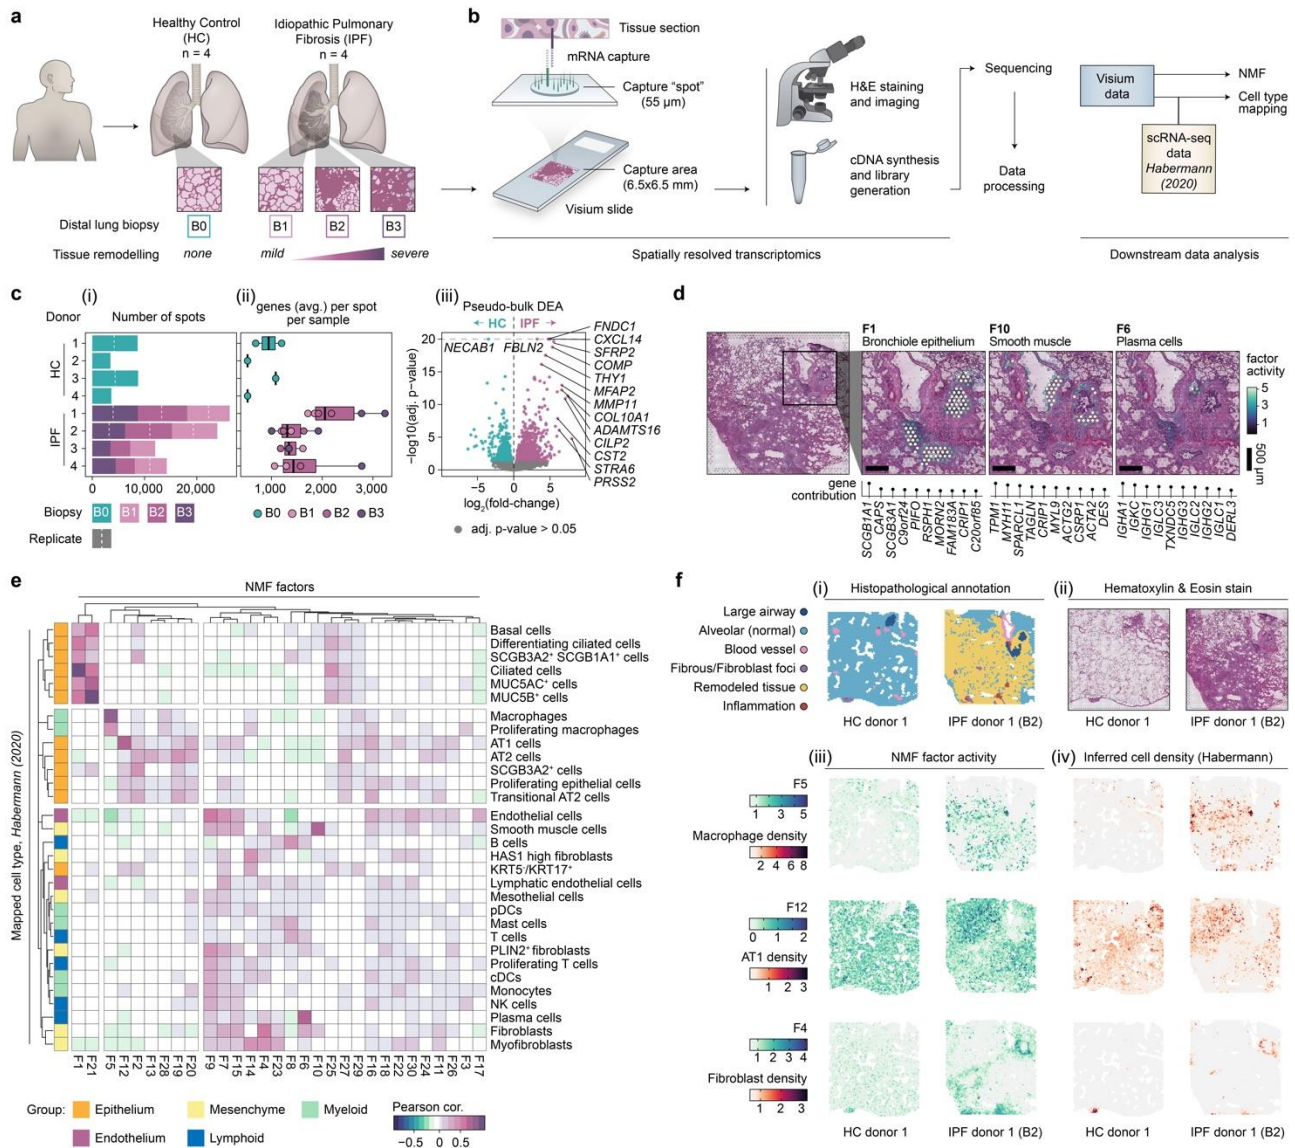

79

80 **Figure 1. Spatial transcriptomic profiling of human pulmonary fibrosis.** **a**) Tissue sections from distal lung biopsies  
 81 from healthy controls (HC; B0; n=4) and IPF patients (n=4), were sectioned and analyzed using the Visium Spatial Gene  
 82 Expression technology. Three biopsies exhibiting progressive tissue remodeling (B1-3) were selected from each IPF  
 83 donor. **b**) Schematic illustration of the Visium workflow and subsequent data processing steps. NMF was used for  
 84 dimensionality reduction, generating 30 distinct factors. Cell type distributions were inferred through integration with a  
 85 scRNA-seq dataset published by Habermann et al. (2020; GSE135893). **c**) Summarizing descriptions of the data,  
 86 including the number of Visium capture spots per sample (i), the average number of unique gene detected per spot (ii),  
 87 and a pseudo-bulk differential expression analysis (DEA) comparing pooled HC and IPF Visium data per donor to identify  
 88 significant differentially expressed genes between condition based on data from entire tissue sections (iii). **d**) Spatial  
 89 distribution maps for selected NMF factors that correspond histological and/or transcriptional profiles of bronchiole  
 90 epithelium (F1), smooth muscle (F10), and plasma cells (F6). **e**) Correlation (Pearson) heatmap of NMF factor activity and  
 91 inferred cell type densities, using the Habermann et al. scRNA-seq data set, across spots. **f**) Histopathological annotations  
 92 performed on sections from each HC and IPF biopsy (i) based on the H&E stained Visium sections (ii). Visualizing spatial  
 93 NMF activity (iii) and inferred cell type densities (iv), confirms the co-localization of highly correlated factor-cell pairs. H&E,  
 94 hematoxylin and eosin; NMF, non-negative matrix factorization; DEA, differential expression analysis; AT1, alveolar type 1  
 95 cells; AT2, alveolar type 2 cells; pDC/cDCs, plasmacytoid/classical dendritic cells; NK cells, natural killer cells.

96 **Deconvolution of spatial gene expression identifies morphological structures and cell types.** The data  
97 were deconvoluted into 30 “factors” using non-negative matrix factorization (NMF)<sup>30</sup> (**Fig. 1d**). These factors  
98 revealed gene signatures of distinct cell types and structures including mixed bronchiolar epithelial cell types  
99 (Factor 1; F1), smooth muscle cells (F10), and plasma and B cells (F6). The spatial distribution of cell-type  
100 densities was further inferred by integration<sup>31</sup> with an IPF-derived scRNA-seq dataset<sup>5</sup> (referred to as  
101 “Habermann (2020)”). This revealed a distinct group (F1 and F21) that correlated with ciliated airway cell  
102 types, including basal cells, club cells, ciliated cells, and MUC5B+ cells (**Fig. 1e**), in line with spatial mapping  
103 of F1 activity to bronchial epithelium. Other factors correlated specifically with the alveolar compartment,  
104 including alveolar macrophages (spatial overlap with F5; **Fig. 1f**), AT1 cells (spatial overlap with F12 and  
105 annotated alveolar tissue; **Fig. 1f**), and AT2 cells. An additional group of factors corresponded to immune  
106 cells and stromal components of the lung, including lymphocytes, endothelial cells and fibroblasts (spatial  
107 overlap with F4 and areas labelled as fibrous or remodeled tissue; **Fig. 1f**). Several factors could not be  
108 clearly attributed to specific cell types/groups, likely representing a more complex mixture of cells, cell types  
109 not annotated in the reference dataset, and/or novel cell states. This included F16 in the alveolar  
110 compartment of HC and IPF lungs (**Fig. 1e**), dominated by prostaglandin signaling genes and AT1, AT2, and  
111 fibroblast marker genes.

112 **Dissecting factor activity reveals pathways and cellular interactions.** Further examination of factor  
113 distribution across samples revealed 11 factors that were more prevalent in IPF compared to HC (**Fig. 2a**).  
114 These factors associated with important IPF cell morphologies/processes (**Fig. 2b**) including ECM-related  
115 pathways, and overlapped with regions of tissue fibrosis (F4 and F14) or classic IPF “honeycomb” formations  
116 (F5 and F21), whereby F5 displayed markers of dendritic cells and macrophages, whilst F21 presented a  
117 *MUC5B*-expressing airway epithelial signature. The F21 profile might reflect a previously identified MUC5b+,  
118 BPIFB1+, SCGB3A1+ IPF-associated cell population<sup>32</sup>. In line with our SRT data, MUC5b expression has  
119 previously been localized to honeycomb cysts, and *MUC5B* polymorphisms have been linked to IPF risk<sup>33</sup>. F9  
120 appeared to overlap with alveolar regions in IPF tissues and was dominated by genes related to oxidative  
121 stress, inflammation, ECM remodeling, and vascular changes, indicating early inflammatory and fibrotic  
122 responses, or potential protective mechanisms in the non-remodeled tissue.

123 Among the ECM/fibrosis-related factors, F14 was highly active in IPF, particularly in the more severely  
124 remodeled tissue (**Fig. 2c**). In addition to various collagens and fibrosis-related genes, keratins such as *KRT7*  
125 and *KRT8* also contributed notably to the factor signature (**Fig. 2d**). F14 activity correlated with inferred cell  
126 type densities of KRT5-/KRT17+ AbBa cells, myofibroblasts, and the recently described HAS1-hi fibroblast  
127 subtype<sup>5</sup>, specifically in the IPF samples (**Fig. 2e**). One lung (IPF donor 2) demonstrated a weaker correlation  
128 between F14 and the KRT5-/KRT17+ AbBa cell type, possibly reflecting interindividual heterogeneity in IPF  
129 cellular processes. Visual inspection confirmed that F14 positive spots coincided with the correlated cell types,  
130 and revealed that F14 activity spatially aligned with fibroblastic foci (FF) (**Fig. 2f**), a histological feature of  
131 active tissue remodeling<sup>24,34,35</sup>. Spots with elevated KRT5-/KRT17+ AbBa cell densities were predominantly  
132 situated along the FF borders, confirming the previously proposed positioning of these cells within the fibrotic  
133 human lung<sup>4</sup>. Importantly, our NMF approach thus identified a signature encompassing the KRT5-/KRT17+  
134 AbBa cell type independently of scRNA-seq data, placed in its spatial histological context across IPF samples.



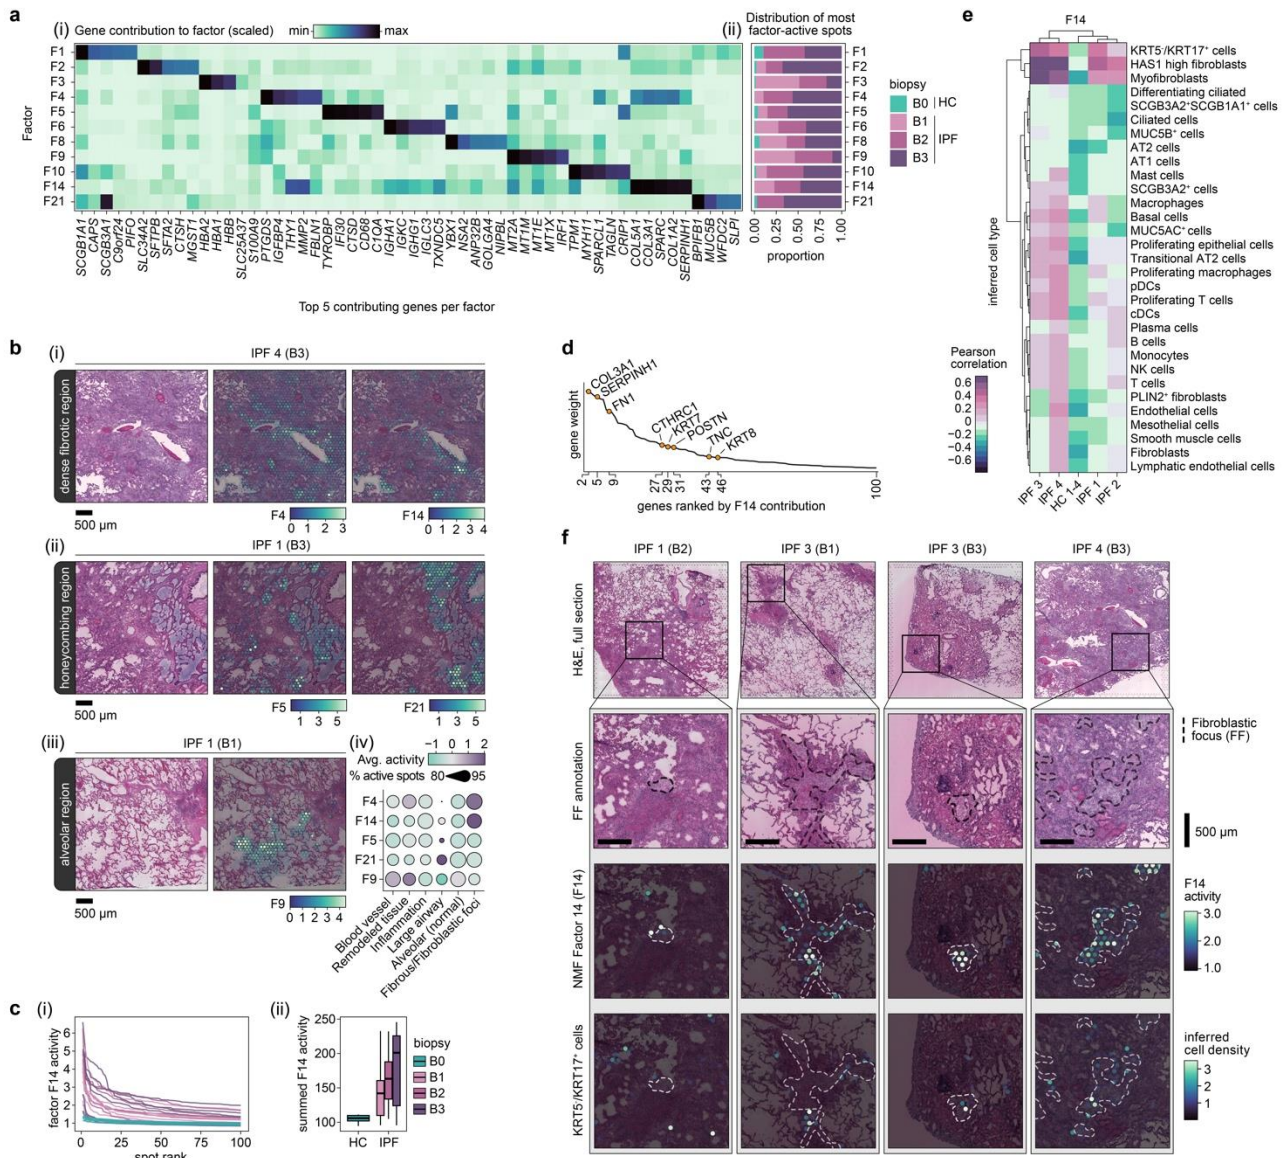

135

136 **Figure 2. Disease-associated signatures revealed by non-negative matrix factorization.** a) NMF identified signatures  
 137 over-represented in IPF tissue. Their relative contribution to each factor (scaled) is displayed for the top five contributing  
 138 genes per factor (i), and the proportion of spots with the highest activity (99<sup>th</sup> percentile) by condition and biopsy severity  
 139 grade (ii). b) Spatial representation of selected NMF factors across IPF lung sections, demonstrating distinct localization  
 140 patterns. F4 and F14 marked heavily fibrotic regions (i), F5 and F21 associated with honeycombing structures (ii), and F9  
 141 were seen in alveolar regions (iii). Displaying the average activity (scaled and centred) and detection rate (percentage of  
 142 spots with increased activity) within the annotated histological regions across all biopsies (iv) c) Activity profile of the top  
 143 100 ranked spots per sample based on F14 activity, highlighting a consistent distinction between HC and IPF tissues (i),  
 144 further summarized by summing the F14 activity levels displayed in (i) and grouped based on biopsy remodelling extent  
 145 (B0-3) (ii). d) The contribution ranking of the top 100 genes for F14 based on gene weight (contribution) to the factor, with  
 146 keratins, collagens, and other fibrosis-related genes emphasized. e) Correlation heatmap between F14 activity and  
 147 densities of inferred cell types within spatial spots, capturing potential co-localization of F14 and cell types (strong  
 148 correlation suggests spatial co-occurrence). f) Visualization of fibrotic focus (FF) annotations, F14 activity, and the  
 149 distribution of inferred KRT5-/KRT17+ cells, providing a spatially integrated view of the fibrotic niche. NMF, non-negative  
 150 matrix factorization.

## 151 Characterization of the aberrant basaloid epithelial and fibrotic niche in IPF

152 To better understand the cell type heterogeneity in the FF-specific factor, F14, we isolated its most active  
 153 spots (denoted F14<sup>hi</sup>) and identified five distinct sub-clusters, denoted F14<sup>hi</sup> C0-C4 (Fig. 3a). Defining genes  
 154 of C0 corresponded to markers of the KRT5-/KRT17+ AbBa cell type (e.g. *PRSS2*, *KRT7*)<sup>4,5</sup>, characteristically

155 devoid of the basal cell marker *KRT5*. The remaining four F14<sup>hi</sup> clusters expressed genes corresponding to  
156 fibroblasts/myofibroblasts (C1 and C2), macrophages (C3), and basal and secretory airway epithelial cells  
157 (C4). Based on the marker gene profiles, C1 and C2 appeared to represent fibrotic populations with distinct  
158 roles, whereby C1 displayed a matrix deposition and scar formation profile, while C2 had markers indicative of  
159 stress responses (metallothioneins), immune modulation (*CCL2*, *FCN3*), and vascular interactions (*ENG*,  
160 *THBD*), likely reflecting diverse fibroblast phenotypes within the fibrotic niche of IPF lungs. Spatial inspection  
161 revealed alignment of C0-spots with the edges of FF (**Fig. 3b**), mirroring the spatial distribution of inferred  
162 KRT5-/KTR17+ AbBa cell densities (**Fig. 2f**) and corroborating C0 as a refined AbBa-dense population within  
163 F14. In contrast, the cluster displaying fibroblast markers resided within the FF core.

164 **Cellular crosstalk and molecular signaling in the IPF AbBa microenvironment.** We found a higher  
165 abundance of AT2 cells and transitional AT2 cells around the F14<sup>hi</sup>C0 AbBa niche, compared to more distant  
166 regions (**Fig. 3c**), whereby the peak of transitional AT2 cell density was observed at a shorter distance  
167 compared to the peak of AT2 cells. This suggests a possible differentiation lineage from AT2 to transitional  
168 AT2 cells and towards AbBa cells, consistent with a previously proposed cell trajectory<sup>5</sup>, captured in space.  
169 Additionally, the proximity of SCGB3A2+ secretory cells to F14<sup>hi</sup>C0 spots aligns with previous findings  
170 suggesting them as another potential source for AbBa cells<sup>5,32</sup>.

171 We observed a decline in matrix remodeling and fibrosis-associated genes (e.g., *MMP11*, *POSTN*, *COL1A2*)  
172 with increasing distance from F14<sup>hi</sup>C0 (**Fig. 3d**), indicating elevated fibrotic activity around AbBa cells.  
173 Conversely, genes linked to alveolar function and immune response (e.g., *SFTPA2*, *SFTPC*, *SLPI*) showed  
174 lower expression within C0 compared to its immediate surroundings. A group of immunoglobulin-related  
175 genes (e.g., *IGLC1*, *IGKC*, *PIGR*) resided near AbBa cell dense areas, but not within, implying a differential  
176 immune response or possible exclusion of certain immune elements from the AbBa microenvironment.

177 Further analysis of areas neighboring (nb) the F14<sup>hi</sup>C0 spots identified clusters containing alveolar epithelial  
178 cells (nb. cluster 0), fibroblasts/myofibroblasts (nb. cluster 1), alveolar macrophages (nb. cluster 2), and  
179 plasma cells (nb. cluster 3) (**Fig. 3e**), allowing us to study regulatory molecules and signaling within and  
180 between clusters. Upstream regulator and pathway enrichment analyses performed in Ingenuity Pathway  
181 Analysis (IPA) predicted upstream activation in F14<sup>hi</sup>C0 and nb. cluster 1 of molecules (including *TGFB1*,  
182 *TGFB2*, *MRTFB*, *TEAD1-4*, *ISG15*) known to be involved in fibrosis (**Fig. 3f**). The canonical pro-fibrotic  
183 cytokine TGF- $\beta$  (encoded by *TGFB1* and *TGFB2*) plays a significant role in IPF<sup>28,36</sup> and has been implicated in  
184 ADI cell formation and inhibition of differentiation towards AT1 cells<sup>37</sup>. *MRTFB* regulates myofibroblast  
185 differentiation<sup>38</sup>, whilst *TEAD* family members (part of YAP/TAZ co-activator complex) are key effectors of  
186 profibrotic pathways including Hippo-, TGF- $\beta$ , and Wnt signaling<sup>39-41</sup>, implicated in tissue regeneration and in  
187 fibrosis<sup>29,42</sup>. The p53 modulator, *ISG15*, implicated in age-related signaling<sup>43</sup>, was a predicted activated  
188 upstream regulator of F14<sup>hi</sup>C0. Enrichment of IPF-, glycoprotein VI (GP6)-, and wound healing signaling  
189 pathways, along with pathways associated with cell movement and migration, further supports an active  
190 fibrogenic node.

191



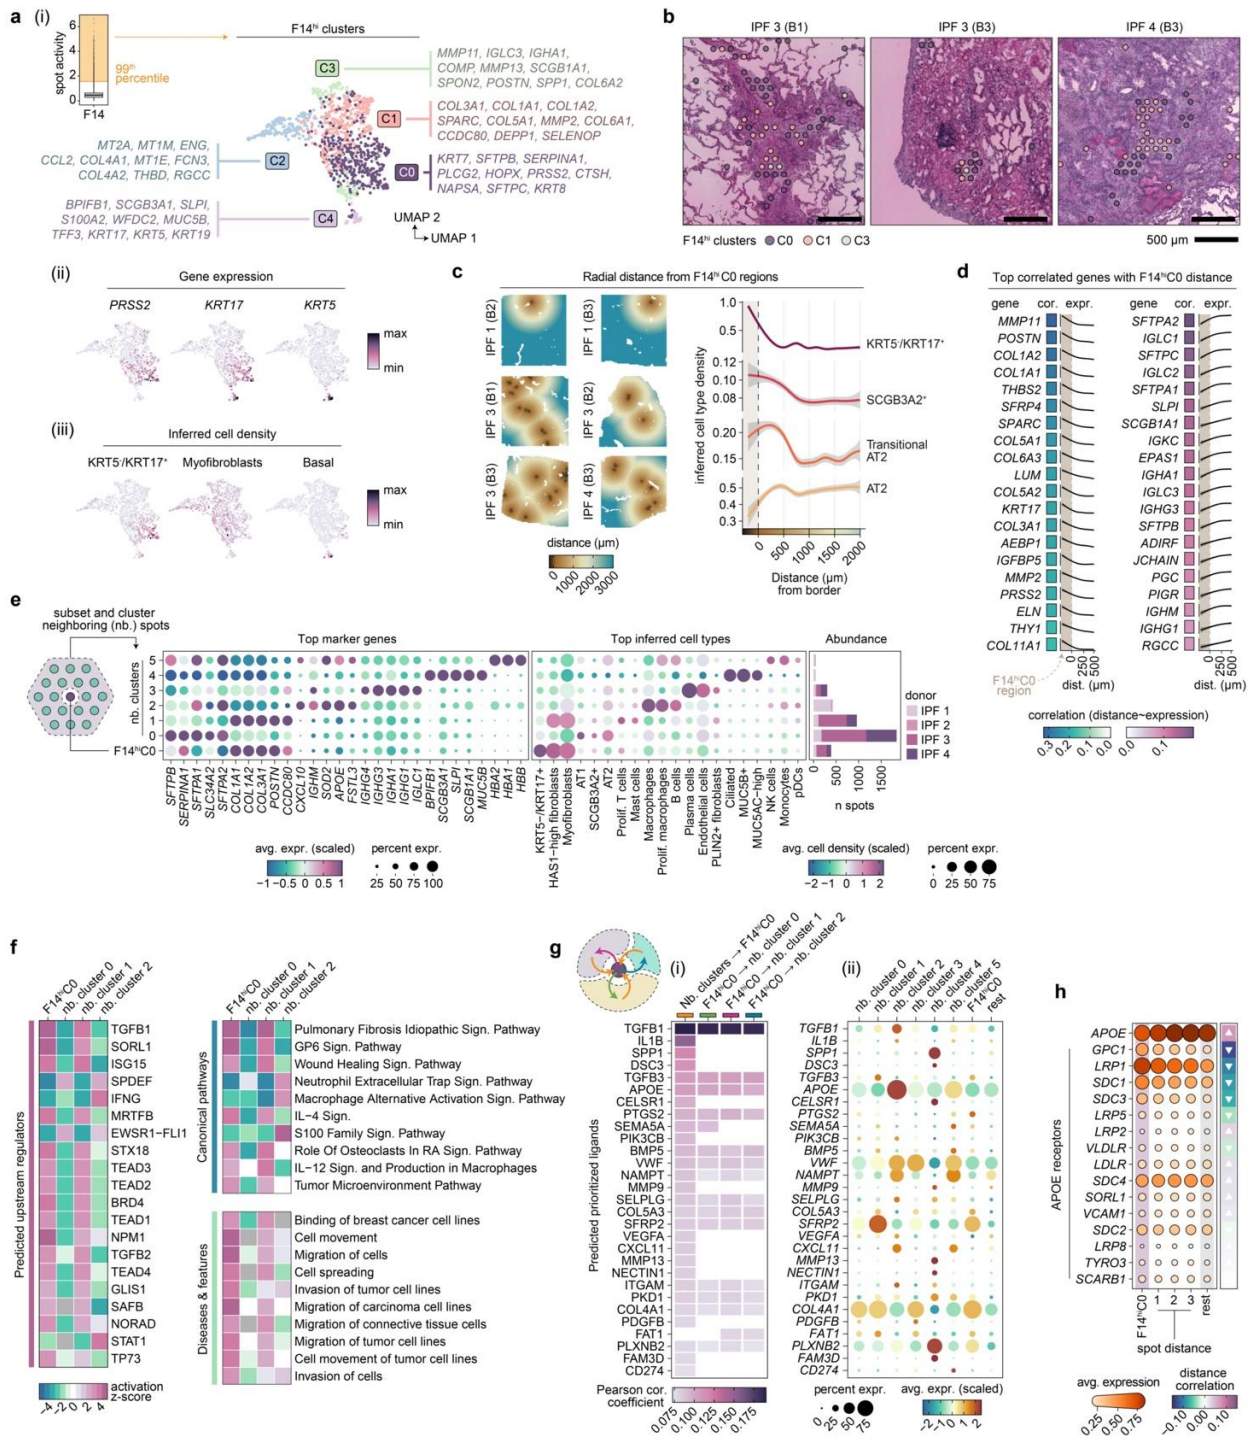

192  
193  
194 **Figure 3. Cellular and molecular deconvolution of the aberrant basaloid niche.** **a)** Clustering of the 99<sup>th</sup> percentile of  
195 F14 active (F14<sup>hi</sup>) spots identified five distinct clusters (F14<sup>hi</sup>C0-4), visualized in UMAP space, with the corresponding top  
196 ten gene markers listed (i). Expression of the KRT5-/KRT17+ aberrant basaloid cell gene markers PRSS2 and KRT17,  
197 along with the absence of KRT5, overlapped with F14<sup>hi</sup>C0 (ii). Inferred cell-type densities highlighted the prominence of  
198 KRT5-/KRT17+ cells in F14<sup>hi</sup>C0, while lacking inferred basal cells (iii). **b)** The spatial location of F14<sup>hi</sup> clusters within FF in  
199 representative IPF biopsies. F14<sup>hi</sup>C0 was predominantly observed at the periphery of FF, while F14<sup>hi</sup>C1 (fibroblasts)  
200 localized to the FF core. **c)** The spatial tissue location of cluster F14<sup>hi</sup>C0 across IPF lung sections with an analysis of  
201 inferred cell type densities relative to the radial distance from the F14<sup>hi</sup>C0 boundary (distance = 0). Distances below zero  
202 corresponds to spots within F14<sup>hi</sup>C0. Smoothed cell type densities produced by fitting a generalized additive model (GAM)  
203 to the data, where gray shadings indicate 95% confidence interval **d)** Gene expression correlation analysis within a 500  
204 μm radius from the F14<sup>hi</sup>C0 border identified the top 20 positively and negatively associated genes based on correlation  
205 (Pearson) values. **e)** Neighboring (nb.) clusters of the F14<sup>hi</sup>C0 regions were generated by further clustering of spots within  
a 2-spot distance (~ 200 μm) of the F14<sup>hi</sup>C0 borders. Dot plots displays the top marker genes of each F14<sup>hi</sup>C0 nb. cluster



206 and the inferred cell type densities of selected cell types to highlight their abundance within each cluster. Bar chart shows  
207 the number of spots per donor labeled with each F14<sup>hi</sup>C0 nb. cluster. **f)** Enrichment analysis in Ingenuity Pathway Analysis  
208 (IPA) based on marker genes (adj.  $p < 0.05$ ) for nb. clusters 0-2 when compared against each other, and F14<sup>hi</sup>C0 markers  
209 when compared against all other spots in the IPF samples. Heatmaps of activation z-scores of top 20 significant predicted  
210 upstream regulators, and top 10 enriched canonical pathways and diseases and functions. **g)** Cell-cell communication  
211 analysis using NicheNet within the F14<sup>hi</sup>C0 niche. Prediction of prioritized ligands acting upon the F14<sup>hi</sup>C0 and nb. clusters  
212 0-2 regions (i), with mean expression levels of the ligands in each cluster to deduce the potential origin of the ligand (ii). **h)**  
213 Average expression levels of *APOE* and its canonical receptors within F14<sup>hi</sup>C0 and their change over radial spot distance  
214 (3 spots; ~300  $\mu\text{m}$ ), where “rest” corresponds to the background expression observed across all remaining spots across  
215 samples. Directional arrows indicating correlation (Pearson) trends based on expression over spot distance. UMAP,  
216 uniform manifold approximation and projection; FF, fibroblastic foci.

---

217 Prediction analysis of ligand-target interaction<sup>44</sup>, with directional information preserved (Methods), identified  
218 further cell-cell communications within the F14<sup>hi</sup>C0 microenvironment, including TGFB1, IL1B, and SFRP2  
219 (**Fig. 3g**). SFRP2 (a Wnt signaling modulator) expression distinctly originated from the neighboring fibroblast  
220 cluster, implicating potential autocrine/paracrine Wnt signaling between (myo)fibroblasts, alveolar epithelial,  
221 and AbBa cells. Furthermore, the predicted ligand apolipoprotein E (*APOE*), with its receptor SORL1 being an  
222 upstream regulator of the AbBa-dense cluster, was highly expressed in the macrophage cluster, alluding to a  
223 monocyte-derived and M2-like profile of the neighboring macrophage population<sup>45,46</sup>. By analyzing the gene  
224 expression data of all annotated *APOE* receptors across the F14<sup>hi</sup>C0 region distance, we identified an inverse  
225 expression pattern between *APOE* and several of its receptors (**Fig 3h**). Glypican 1 (*GPC1*), LDL receptor-  
226 related protein 1 (*LRP1*), and syndecan 1 (*SDC1*) were more highly expressed within, and in close proximity  
227 to, the F14<sup>hi</sup>C0 region. These observations suggest a potentially under-recognized role for apolipoprotein  
228 signaling within the AbBa cell fibrotic niche in IPF.

## 229 **Spatially resolved transcriptomics in a mouse model of pulmonary fibrosis**

230 To increase understanding of the translational predictivity of the BLM mouse model for human IPF, we  
231 generated SRT data from mouse lung samples collected at day 7 (d7) and day 21 (d21) following BLM or  
232 saline (vehicle) administration (**Fig. 4a**).

233 Healthy alveolar regions accounted for 80-90% and 30-50% of the total number of spots in saline and BLM  
234 challenged lungs, respectively. Remaining spots in the BLM challenged samples were labelled as areas of  
235 tissue damage or remodeling. A pseudo-bulk DEA between BLM and vehicle controls identified a total of 3214  
236 and 3787 DEGs at d7 and d21, respectively.

237 **Comparative analysis of gene expression and cellular composition.** We identified differentially expressed  
238 genes (DEGs) in annotated fibrotic areas compared to control samples in the mouse model and analyzed their  
239 overlap with DEGs in IPF (**Fig. 4b**). Numerous DEGs overlapped between mouse and human (178 between  
240 IPF and d7 BLM fibrotic regions, and 93 between IPF and d21 BLM), with eight DEGs displaying contrasting  
241 fold-change directionality. Among the latter, most are involved in ECM organization (*COL17A1*<sup>47</sup>),  
242 inflammatory signaling (*CX3CL1*<sup>48</sup>), and apoptosis regulation and cellular adhesion (*S100A14*<sup>49</sup>, *FAIM2*<sup>50</sup>).  
243 While these genes may play a role in fibrosis in both conditions, Their inverse expression patterns of these  
244 DEGs suggest divergent roles in human IPF compared to the mouse BLM model.

245 Cell type deconvolution was performed using a lung scRNA-seq dataset generated in the BLM mouse model<sup>11</sup>  
246 (referred to as “Strunz (2020)”). Spatial visualization of cell type densities demonstrated accurate mapping to  
247 relevant tissue regions, where alveolar epithelial cells were inferred in healthy alveolar tissue (**Fig. 4c**).

248 Pronounced differences in cell type densities were observed between BLM and vehicle groups, including  
249 resolution (M2 polarized) macrophages and Krt8+ADI cells (**Fig. 4d**). AT2 cell abundance decreased at d7 but  
250 showed recovery by d21. The apparent influx of recruited (pro-inflammatory) macrophages at d7 normalized  
251 by d21, confirming resolution of acute inflammation.

252 **Spatial compartmentalization reveals dynamic lung tissue remodeling in response to BLM.** Co-  
253 localization analysis revealed dynamic spatial compartmentalization of cell types within spots, capturing the  
254 spatiotemporal dynamics of fibrogenesis and indicating lung tissue remodeling in response to BLM injury (**Fig.**  
255 **4e**). In vehicle control lungs, we identified two compartments consisting of bronchial epithelial (A) and alveolar  
256 (B) tissue, outlining the uninjured lung architecture. In the d7 BLM-challenged lungs, prominent cell densities  
257 consisted of bronchial epithelium (C), alveolar epithelium and alveolar capillary endothelium (D), and  
258 remodeled alveolar tissue marked by fibroblasts and myofibroblasts (E). At d21 the cellular composition of the  
259 compartments was altered, so that in addition to bronchial epithelium (F) and fibrotic, remodeled alveolar  
260 tissue (H), we observed a compartment (G) characterized by alveolar epithelium macrophages and Krt8+ADI  
261 cells, exhibiting a profile of regenerating alveolar tissue (**Fig. 4e**). Spatial mapping confirmed that F aligned  
262 with bronchial structures, H coincided with fibrotic/remodeled tissue, while G was present along the borders of  
263 fibrotic areas and extending into intact tissue (**Fig. 4f**).

264 **Comparative analysis of regenerative signatures reveals divergent epithelial responses.** Given that day  
265 21 in the mouse model reflected an established stage of fibrosis with minimal acute inflammation, we focused  
266 on this time point for comparison with IPF. NMF application to the mouse d21 data (mmNMF<sub>d21</sub>) generated 30  
267 factors. Factor activity and cell type abundance co-localization analysis largely reflected the d21 BLM  
268 compartmentalization, affirming that NMF effectively captures patterns comparable to the cell type  
269 deconvolution approach (**Fig. 4g**). The regenerating alveolar epithelial compartment (G) was represented by a  
270 set of factors primarily reflecting AT2 cells (F30), alveolar and resolution macrophages (F8), or activated AT2  
271 and Krt8+ADI cells (F14). Factors F18, F5, and F7 predominantly represented AT1 and endothelial cells.

272 We further compared mmNMF<sub>d21</sub> factors with factors identified by IPF NMF analysis (hsNMF) (**Fig. 4h**). The  
273 top contributing genes showed an overall weak overlap between human and mouse factors. However, factors  
274 associated with distinct morphological features, such as smooth muscle cells (SMC), blood vessels, and  
275 ciliated airway epithelium, demonstrated more pronounced overlap, highlighting conserved signatures normal  
276 lung structures, compared to disease or injury responses. Notably, factors containing transcriptional  
277 signatures for the human KRT5-/KRT17+ AbBa cells (hsNMF-F14) and mouse Krt8+ADI cells (mmNMF<sub>d21</sub>-  
278 F14) had a limited overlap.

279

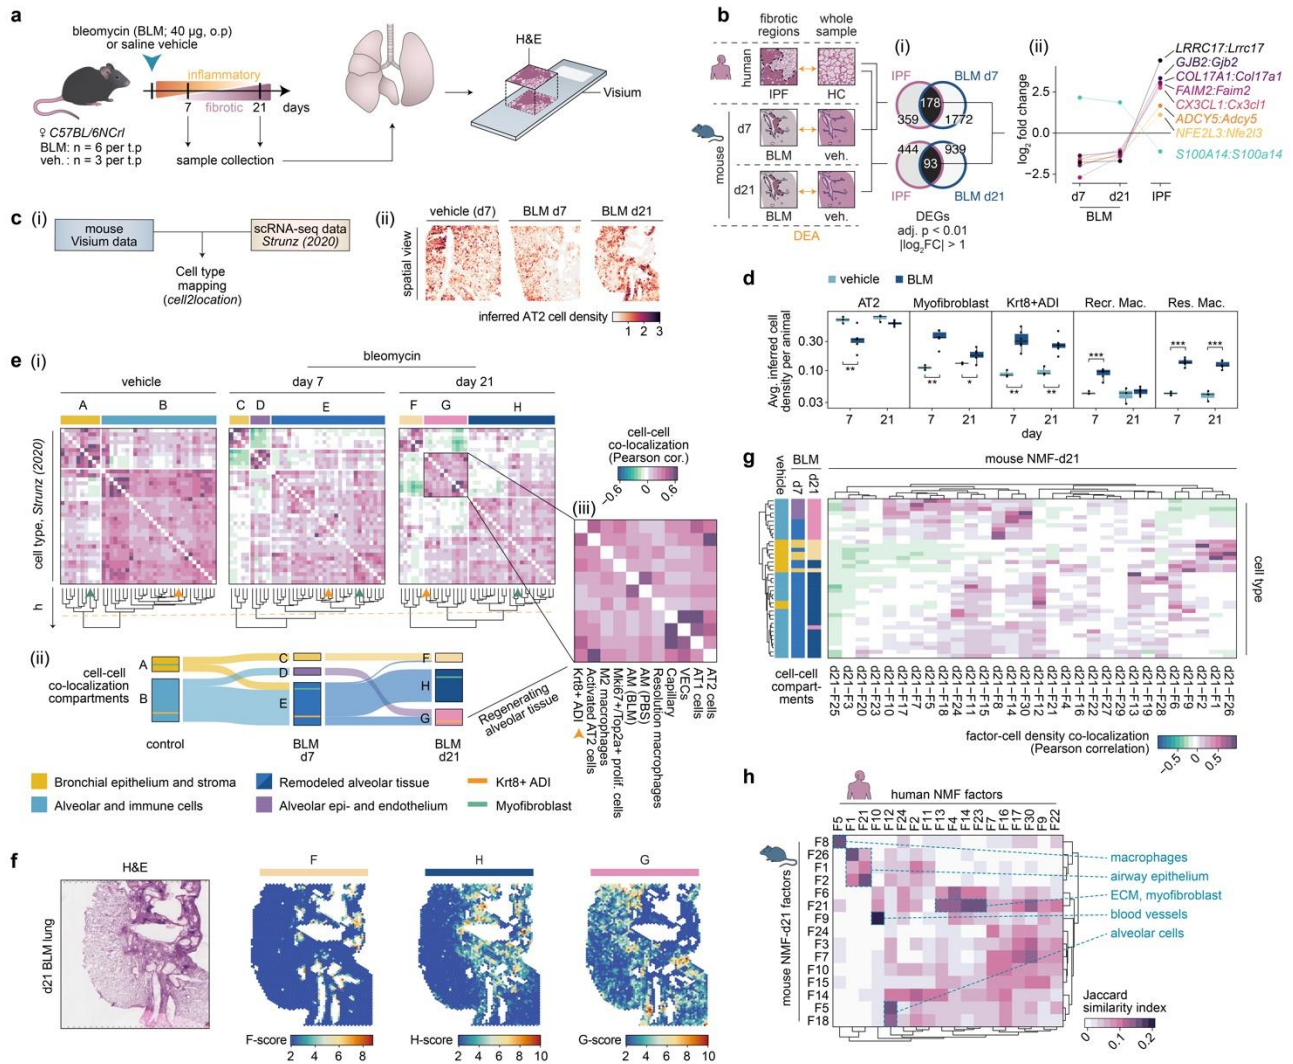

280

281 **Figure 4. Comparative spatial analysis of pulmonary fibrosis in mouse and human.** **a**) Experimental design for the  
 282 mouse bleomycin (BLM) lung injury model. Mouse lungs were collected at days 7 (d7) and 21 (d21) post BLM or vehicle  
 283 administration for spatial transcriptomic analysis using the Visium platform (n=6 BLM, n=3 vehicle per time point). **b**)  
 284 Differential expression analysis (DEA) compared annotated fibrotic regions in human IPF and BLM-treated mouse tissue  
 285 against respective controls. Venn diagrams of differentially expressed genes (DEGs) specific and shared between human  
 286 IPF and mouse d7 or d21 post-BLM treatment (i), where the shared genes exhibiting inverse expression patterns between  
 287 human IPF and the BLM samples are further explored (ii). **c**) Schematic overview of the scRNA-seq data integration, using  
 288 Visium data and the annotated scRNA-seq data set published by Strunz et al. (2020; GSE141259) as input for  
 289 cell2location to infer spot cell type densities (i). Exemplified by the inferred AT2 cell density in selected Visium samples  
 290 across time points (ii). **d**) Averaged cell type abundance per animal, comparing densities between timepoints and  
 291 treatments for selected cell types. Welch Two Sample t-test (two-sided;  $n_{veh.} = 3$ ,  $n_{BLM} = 6$ , per time point) was used to test  
 292 for significance between groups, \*  $p < 0.05$ , \*\*  $p < 0.01$ , \*\*\*  $p < 0.001$ . Center line, median; box limits, upper and lower  
 293 quartiles; whiskers, 1.5x interquartile range; points, value per animal. **e**) Inferred cell-cell correlation heatmaps display  
 294 distinct cellular co-localization compartments that changes across condition and time. Compartments (A-H) were identified  
 295 based on the same height,  $h$ , cutoff (orange dashed line) ( $h = 1.5$ ) of the hierarchical clustering for the selected data  
 296 subsets (i). Sankey diagram depicting the shift in cell types within each compartment from vehicle controls to BLM d7 and  
 297 then BLM d21, illustrating the cellular spatiotemporal dynamics within fibrotic mouse lungs (ii), with Krt8+ADI (orange line)  
 298 and myofibroblast (green line) populations highlighted how they move across compartments. Zooming into compartment G  
 299 (iii), Krt8+ADI cells (orange arrow) are found co-localizing with alveolar epithelial cells and macrophages. **f**) Computed  
 300 scores for each compartment (F-H scores), calculated by summing the cell type densities of the compartment-associated  
 301 cell types, displayed in a BLM d21 lung section alongside the H&E staining of the same section. **g**) NMF was performed  
 302 on the d21 subset and the factor activities in each spot were compared with inferred cell-type densities using Pearson  
 303 correlation and hierarchical ordering. The cell type group colors correspond to their respective compartments (A-H) based  
 304 on the prior analysis and highlight sets of factors that strongly matches distinct or groups of cell types, largely capturing a  
 305 similar BLM d21 compartmentalization. **h**) Comparison of gene contributors to the human derived NMF analysis with  
 306 the mouse d21 NMF analysis, by computing and visualizing the Jaccard similarity coefficient based on the top 100 genes



307 contributing to each factor. Heatmap displays filtered results based on factors having a Jaccard index of > 0.1 with at least  
308 one other factor, to exclude factors with no apparent overlap between species. NMF, non-negative matrix factorization;  
309 DEA, differential expression analysis; DEG, differentially expressed genes; ADI, alveolar differentiation intermediate; AM,  
310 alveolar macrophages; Recr. Mac., recruited macrophages; Res. Mac., resolution macrophages; VECs, vascular  
311 endothelial cells; ECM, extracellular matrix.

---

## 312 Translation of the fibrotic microenvironment

313 **Contrasting fibrogenic and regenerative responses in human IPF and BLM-induced lung fibrosis in**  
314 **mouse.** We analyzed the spatial correlation of the factors containing KRT5-/KRT17+ AbBa (hsNMF-F14) in  
315 human IPF samples and the factors containing Krt8+ADI cells (mmNMF<sub>d21</sub>-F14) in the mouse BLM samples.  
316 HsNMF-F14 activity predominantly correlated with fibroblasts (HAS1-hi), myofibroblasts, and KRT5-/KRT17+  
317 AbBa cells. Conversely, mmNMF<sub>d21</sub>-F14 activity primarily correlated with Krt8+ADI cells and AT2 cells, while  
318 showing a weaker correlation with myofibroblasts. Additionally, mmNMF<sub>d21</sub>-F14 showed correlation (albeit  
319 weaker) with AT1 cells, unlike hsNMF-F14 (**Fig. 5a**), in line with the distinct fibrogenic environment in the  
320 human aberrant basaloid niche.

321 To further compare the gene signatures of the AbBa (IPF) or ADI (BLM) niches, we refined mmNMF<sub>d21</sub>-F14  
322 and clustered the spots based on gene expression (Methods), and identified four clusters (mmNMF<sub>d21</sub>-F14<sup>hi</sup>  
323 C0-3), where cluster 0 (mmNMF<sub>d21</sub>-F14<sup>hi</sup> C0) exhibited the strongest association with Krt8+ADI cells (**Fig. 5b**).  
324 We detected shared marker genes between hsNMF-F14<sup>hi</sup> C0 and mmNMF<sub>d21</sub>-F14<sup>hi</sup> C0, including several  
325 collagens and ECM-related genes (e.g., *COL1A1*, *FN1*, *TNC*, *CTHRC1*), epithelial cell markers (*CDH1*), and  
326 markers for human AbBa cells (*KRT17*) and mouse ADI cells (*KRT8*) (**Fig. 5c**). This suggests shared traits  
327 between AbBa and ADI regions involving ECM remodeling and a basaloid phenotype, further supported by  
328 pathway analysis. However, the ADI-related gene signature observed in mouse predominantly engaged  
329 pathways related to inflammation and repair, whereas the AbBA-related gene signature observed in human  
330 IPF reflected the chronic and progressive nature of IPF, dominated by immune responses and pathways  
331 governing long-term tissue remodeling.

332 For better understanding of the aberrant fibrotic niche drivers, we performed an upstream regulator analysis  
333 for hsNMF-F14<sup>hi</sup> C0 and mmNMF<sub>d21</sub>-F14<sup>hi</sup> C0 (**Fig. 5d**). Both groups had predicted activation of TGFB1,  
334 TP53, and SMAD3, suggesting a conserved TGF- $\beta$ -related mechanism<sup>28,51,52</sup> and cellular senescence<sup>53</sup>.  
335 hsNMF-F14<sup>hi</sup> C0-specific regulators included the anti-fibrotic growth factor BMP7, the ApoE receptor SORL1,  
336 and GLIS1, a component of the Notch signaling pathway. MmNMF<sub>d21</sub>-F14<sup>hi</sup> C0 showed activation of oxidative  
337 stress and inflammation regulators including as HIF1A, IL4, YAP1, and NFE2L2 (NRF2). Contrary to our  
338 previous findings in the human samples suggesting a role for apolipoprotein signaling acting upon hsNMF-  
339 F14<sup>hi</sup> C0 (**Fig. 3f-h**), APOE and its receptor LDLR were predicted as inhibited regulators for the mouse  
340 mmNMF<sub>d21</sub>-F14<sup>hi</sup> C0 spots in this analysis.

341 Next, we examined the histological context of the mmNMF<sub>d21</sub>-F14<sup>hi</sup> C0 cluster and found it primarily situated at  
342 the junction between healthy and fibrotic tissue, comparable to the localization along the FF border seen for  
343 hsNMF-F14<sup>hi</sup> C0 in the IPF samples. Placement at the remodeling tissue interface supports a transitional  
344 niche role for these clusters (**Fig. 5e**).

345

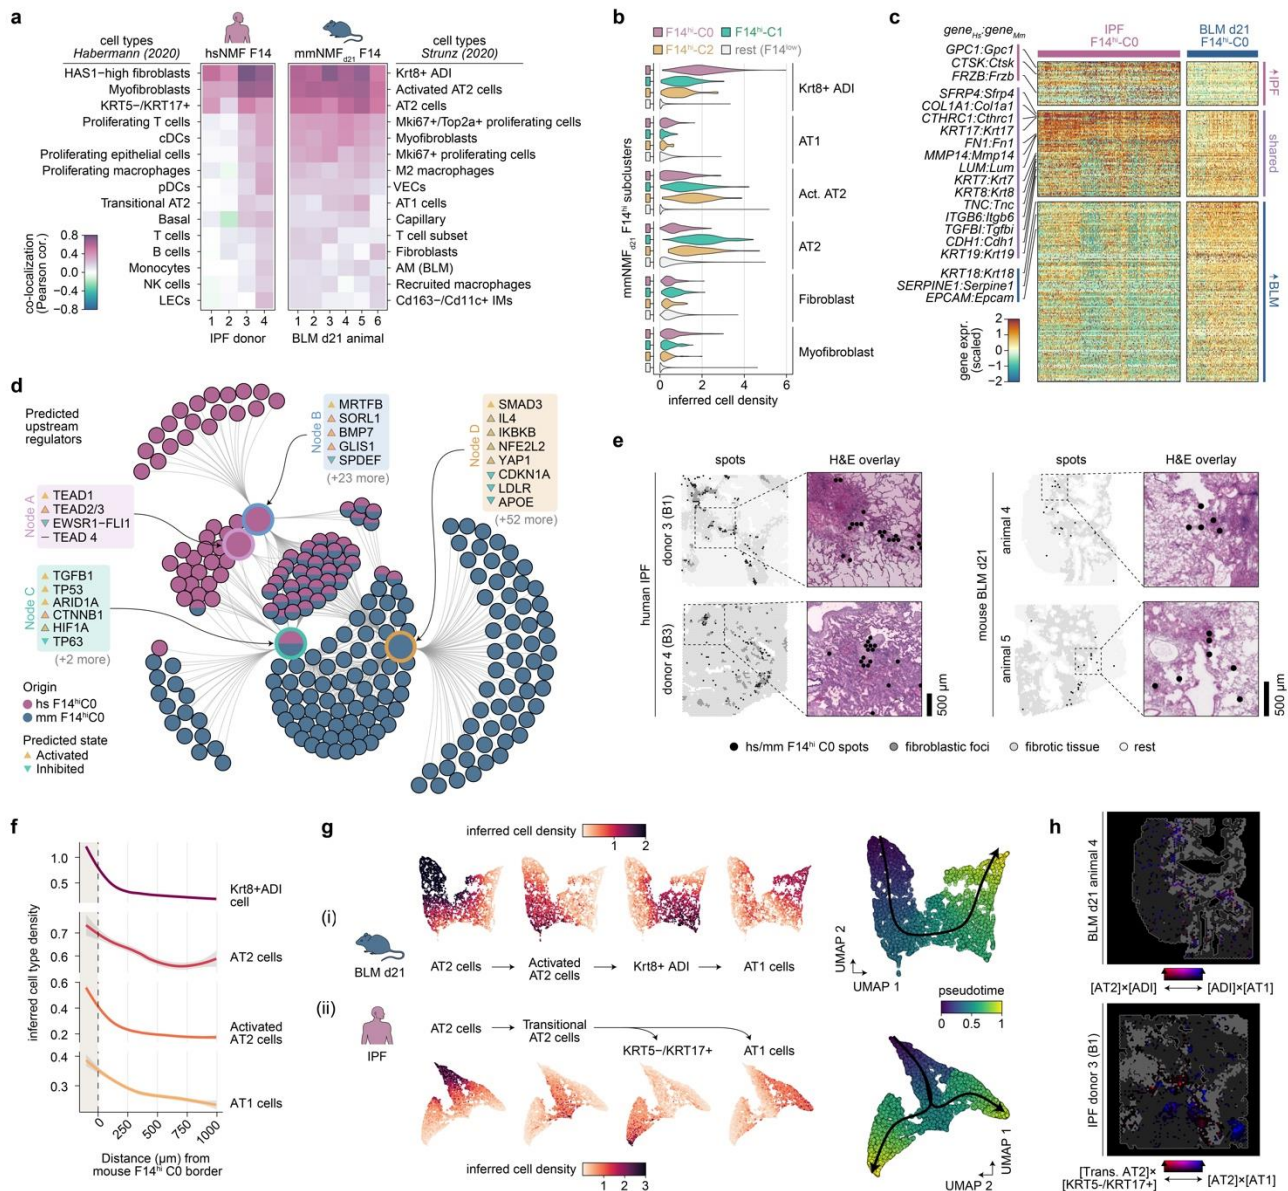

346

347 **Figure 5. Translational dissection of the fibrotic niche and cellular dynamics.** **a)** Correlated activity, per individual, of  
 348 the human (hs) NMF-F14<sup>hi</sup> and mouse (mm) NMF-F14<sup>hi</sup> factors with the 15 highest correlated inferred cell types using the  
 349 Habermann (human) and Strunz (mouse) scRNA-seq data sets. **b)** Distribution of selected cell densities within  
 350 subclustered mmNMF<sub>d21</sub>-F14<sup>hi</sup> spots, demonstrating high abundance of Krt8+ ADI cells within mmNMF<sub>d21</sub>-F14<sup>hi</sup>-C0 while  
 351 high AT2 cell abundance in mmNMF<sub>d21</sub>-F14<sup>hi</sup> C1 and C2. **c)** Integrated IPF and BLM-d21 data sets by converting  
 352 orthologous gene names, allowed identification of marker genes for hsNMF-F14<sup>hi</sup>-C0 and mmNMF<sub>d21</sub>-F14<sup>hi</sup>-C0. Heatmap  
 353 with scaled and centered marker gene expression, grouped based on whether significant marker genes were elevated in  
 354 IPF samples, shared, or higher in mouse BLM tissues. A total of 74 genes were found to be shared, while 39 were seen  
 355 significant in the IPF and 157 in the d21 BLM cluster (adj.  $p < 0.01$ , avg.  $\log_2FC > 0$ ). **d)** Comparative network plot  
 356 showing the most significant regulators (p value  $< 10^{-7}$ , right-tailed Fisher's exact test) based on IPA upstream analyses of  
 357 marker genes (adj.  $p < 0.05$ ) from hsNMF-F14<sup>hi</sup>-C0 and mmNMF<sub>d21</sub>-F14<sup>hi</sup>-C0. Inner nodes illustrate groups of regulators  
 358 sharing genetic influences, and outer nodes represent contributing marker genes. **e)** Spatial mapping of the hsNMF-  
 359 F14<sup>hi</sup>-C0 and mmNMF<sub>d21</sub>-F14<sup>hi</sup>-C0 spots within the tissue sections illustrating the relationship with fibrotic regions, providing  
 360 a visual correlation with areas of disease pathology. **f)** Radial distribution line graphs for inferred cell densities around the  
 361 mmNMF<sub>d21</sub>-F14<sup>hi</sup>-C0 niche mapped out a gradient of alveolar cell composition. Smoothed lines produced using local  
 362 polynomial regression fitting ("loess"), where gray shading corresponds to 95% confidence interval. **g)** Spatial trajectory  
 363 analysis was carried out by selecting spots containing high inferred densities of the selected cell types AT2, activated or  
 364 transitional AT2, Krt8+AD1 or KRT5-/KRT17+, and AT1 cells. Trajectories and pseudotime were thereafter inferred using the  
 365 Slingshot methodology based on UMAP embeddings of the cell type densities for the selected spots, where AT2 cells  
 366 were defined as the starting cluster. Deviating trajectories were seen between IPF and BLM-induced lung fibrosis, where  
 367 in the BLM mouse (i) a single trajectory was observed along the proposed AT2-Krt8+AD1-AT1 lineage, while two divergent  
 368 trajectories were seen in human IPF (ii) in which aberrant basaloid KRT5-/KRT17+ cells were spatially disconnected from

369 AT1 cells. **h**) Spatial co-localization visualization of the AT2-to-Krt8+ADI (red) and ADI-to-AT1 (blue) inferred cell densities  
370 in mouse and the transitional AT2-to-KRT5-/KRT17+ (red) and AT2-to-AT1 (blue) densities in human, by computing cell  
371 density products and visualizing their intensities along a red-blue axis. A mixture of the density products will appear purple,  
372 and the brightness corresponds to value intensity (black = 0). Spots with values of zero are excluded. Tissue outlines and  
373 areas of fibrosis (gray) illustrated for guidance. In mouse, signals along the entire AT2–AT1 trajectory is found mixed near  
374 borders of fibrosis, while in human, spatially isolated regions display high co-localization intensities of cells from the two  
375 inferred trajectories. ADI, alveolar differentiation intermediate; IPA, Ingenuity Pathway Analysis.

---

376 The BLM Krt8+ADI transitional cell population is predicted to originate from either AT2 cells or club cells and  
377 differentiate into AT1 cells<sup>11</sup>. By assessing the cell type densities in relation to their radial distance from the  
378 borders of the mmNMF<sub>d21</sub>-F14<sup>hi</sup> C0 niche, we identified high densities of AT2 cells, activated AT2 cells, and  
379 AT1 cells close to the mmNMF<sub>d21</sub>-F14<sup>hi</sup> C0 niche (**Fig. 5f**). These observations shared similarities with the  
380 corresponding IPF hsNMF-F14<sup>hi</sup> C0 analysis (**Fig. 3c**), highlighting the absence of AT1 cells around the  
381 human AbBa niche.

382 A spatial trajectory analysis of the alveolar epithelial cell types/states (**Fig. 5g**; 'Methods') identified a single  
383 spatial trajectory from AT2 cells to activated AT2 cells, ADI cells, and culminating in AT1 cells, in the BLM  
384 mouse data. In contrast, the cell composition in the IPF lungs displayed a branching trajectory from AT2 cells  
385 through transitional AT2 cells, subsequently diverging into either KRT5-/KRT17+ AbBa or AT1 cells.  
386 Visualizing these trajectories spatially, we observed a separation between transitional AT2–AbBa (fibrosis-  
387 associated) and AT2–AT1 (alveoli-associated) niches (**Fig. 5h**).

388 **Uncovering immune cell dynamics in pulmonary fibrosis.** Our NMF analysis revealed factors in the IPF  
389 and the d7 and d21 BLM datasets that shared key marker genes indicative of macrophages (*SPP1*, *CD68*,  
390 *APOE*). SPP1+ profibrotic macrophages, displaying an M2 polarization phenotype, have previously been  
391 implicated in ECM remodeling and fibrosis development<sup>6,54</sup>. The activity of the selected macrophage factors  
392 was largely localized near fibrosis-associated bronchial regions.

393 A shared histological feature between the IPF lungs and the mouse BLM-injured lungs was the presence of  
394 dense immune cell infiltrates embedded within the fibrotic tissue (**Fig. 6a**). In the timepoint-separated mouse  
395 NMF analyses, mmNMF<sub>d7</sub> and mmNMF<sub>d21</sub>, we identified factors prevalent in regions of immune infiltrates. In  
396 the human NMF, a similar histological feature was not consistently detected, therefore more targeted donor-  
397 specific NMF analyses were performed. Factors in three of the donors (IPF 1-3) were seen to overlap spatially  
398 with the observed immune infiltrates. A closer examination of the gene contributions (**Fig. 6b**) and inferred cell  
399 type composition (**Fig. 6c**) within these immune-dense regions revealed notable differences. In the BLM  
400 mouse model, enrichment of genes such as *Cd74* and *Coro1a* indicated presence of antigen-presenting cells  
401 and lymphocytes<sup>55</sup>. Additionally, a distinct factor was identified in proximity to the d21 BLM immune-dense  
402 structures (**Fig. 6a**), characterized by a plasma cell signature strongly driven by expression of the IgA heavy  
403 chain (*Igha*). Overall, the BLM regions demonstrated a relatively balanced mixture of B, T, and dendritic cells,  
404 in contrast to the human IPF samples which showed a pronounced expression of chemokine CXCL13,  
405 suggesting a B cell-driven immune mechanism<sup>56</sup>. Indeed, B cells were found to dominate, with T cells and  
406 plasma cells playing a lesser role, within the lymphocyte-dense regions in IPF lungs. In accordance with  
407 recent descriptions of their presence in both healthy and diseased lungs<sup>57</sup>, lymphocytes and plasma cells may  
408 have a modulatory role in the progression of fibrosis.



409 Taken together, our analyses delineate distinct cellular trajectories and molecular mechanisms in the fibrotic  
 410 niche of human IPF and the BLM mouse model (**Fig. 6d**). We highlight the arrested alveolar cell regeneration  
 411 in IPF versus the active repair in the BLM model, alongside distinct signaling molecules such as TGF- $\beta$ ,  
 412 ApoE, YAP1, and TEAD, and differences in immune cell presence. These comparative insights underscore  
 413 the unique aspects of fibrosis in human IPF.

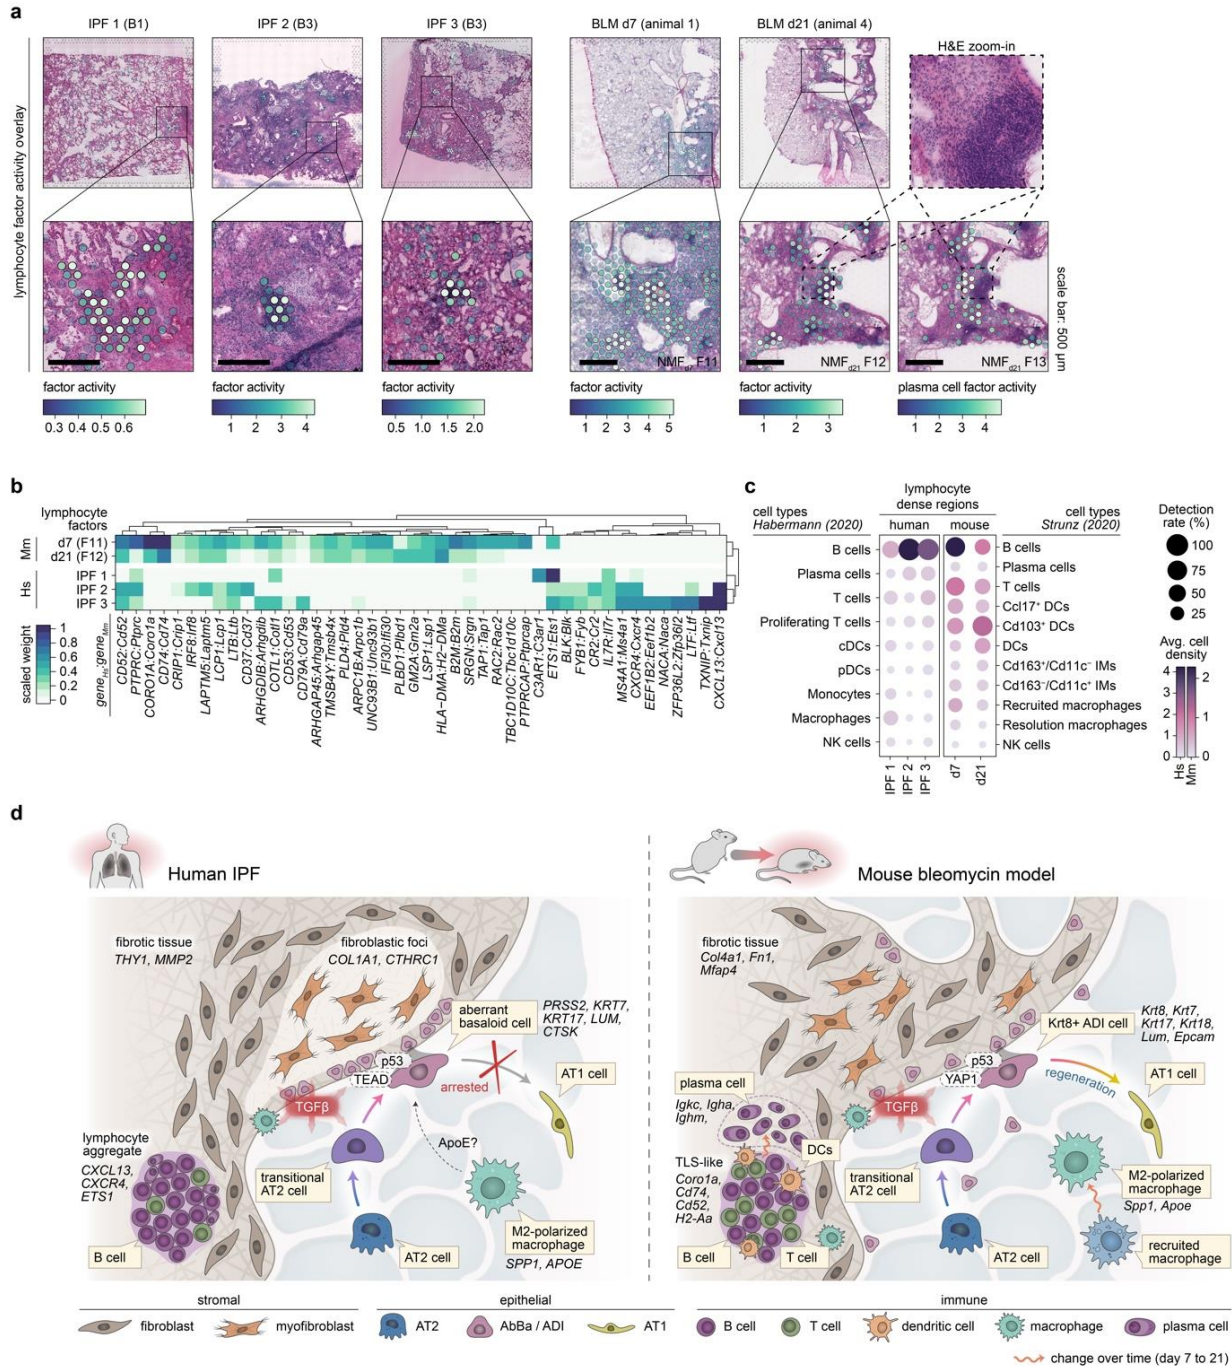

414

415 **Figure 6. Immune cell signatures and comparative overview of fibrotic mechanisms in human IPF and the**  
 416 **bleomycin mouse model. a)** Spatial visualization of NMF factors overlapping dense lymphocyte / immune cell  
 417 aggregates in selected human and mouse samples. Scale bars: 500  $\mu$ m. Imaged at 20X magnification. **b)** Heatmap  
 418 displays the top contributing factor genes across condition, filtered to show genes with a summed scaled weight above 0.5  
 419 across the groups. **c)** Dot plot with inferred cell type densities, for selected immune cell types from the Habermann (2020)  
 420 and Strunz (2020) data sets, in the most active spots of the selected human and mouse factors. **d)** Schematic summary of  
 421 the fibrotic niche in human IPF lungs and in mouse BLM-injured lungs, illustrating the proposed cellular interplay within the

422 fibrotic lungs. A key distinction between IPF and the BLM mouse model was centered around the diverging regenerative  
423 properties of the IPF-associated AbBa cells versus the mouse Krt8+ ADI cells. While both populations exhibit signs of  
424 senescence (p53), the mouse ADI state appears to maintain a functional balance that still prompts it to differentiate into  
425 AT1 cells. TGF-beta and Wnt-related (TEAD, YAP1) signaling pathways were central within the fibrotic niche, and the  
426 presence of immune cells in proximity to, or within, the severely remodeled tissue implies active fibrogenic modulatory  
427 roles. Pro-fibrotic M2-polarized ("resolution") macrophages with similar gene signatures, expressing *SPP1* (*Spp1*) and  
428 *APOE* (*ApoE*), were detected in both human IPF and mouse BLM-injured lungs. In contrast to human IPF AbBa regions, a  
429 predicted negative APOE upstream signaling was identified in mouse ADI regions. In mouse, the recruited pro-  
430 inflammatory macrophages seen at the early timepoint post BLM-installation were absent by day 21. Establishment of  
431 plasma cells adjacent to TLS-like areas in the BLM-injured mice occurred at the later timepoint. AbBa, aberrant basaloid;  
432 ADI, alveolar differentiation intermediate; DCs, dendritic cells; IMs, interstitial macrophages; NK cells, natural killer cells;  
433 TLS, tertiary lymphoid structure.

---

## 434 Discussion

435 Our study presents a comprehensive comparative genome-wide spatial transcriptome map of the diverse  
436 cellular ecosystems and distinct molecular signatures in the human IPF lung and the BLM mouse model.

437 We propose a central involvement of TGF- $\beta$  signaling in IPF, alongside other mediators such as TP53,  
438 SMAD3, BMP7, MRTFB, TEAD, GLIS1, and APOE, which are linked to senescence, myofibroblast activation  
439 and differentiation, Notch and Wnt signaling, apoptosis, and cell migration.

440 Using data factorization, we identified KRT5-/KRT17+ AbBa and Krt8+ ADI cell populations and their  
441 proximate neighborhoods, delineating a critical region within the fibrotic landscape. The complex cross-  
442 directional signaling network illustrated within the AbBa niche suggests these cells serve as a transitional core  
443 in the IPF lung, whereby AbBa cells orchestrate the fibrotic response, signaling to neighboring cells and  
444 modulating the local microenvironment.

445 TGF- $\beta$ , a pro-fibrotic cytokine with a significant role in IPF pathogenesis<sup>28,36</sup>, and SMAD3, integral to the TGF-  
446  $\beta$  signaling pathway<sup>58</sup>, were predicted as upstream regulators in human AbBa and mouse ADI fibrotic niches,  
447 pointing to a shared TGF- $\beta$ -driven fibrotic signaling pathway. Furthermore, our data suggest that the role of  
448 APOE signaling within the IPF fibrotic niche is more substantial than previously appreciated. This warrants  
449 further exploration into the potential regulatory function of APOE in IPF, given its well-documented function in  
450 lipid metabolism and its emerging role in immunomodulation and fibrosis<sup>59,60</sup>.

451 Through tracing the alveolar epithelial cell spatial trajectory, we observe a AT2-ADI-AT1 lineage in the mouse  
452 model that is preserved in situ, supporting previous single cell and in vitro studies<sup>11-13</sup> and indicating an  
453 ongoing post-injury repair mechanism. In contrast, human IPF lungs depicted a divergent path, with AT2 cells  
454 branching into either AbBa cells or AT1 cells. The apparent disruption in the IPF lung regenerative process is  
455 in line with descriptions of AbBa cell persistence as an intermediate, non-regenerative state<sup>5</sup> potentially driving  
456 the progressive, irreversible fibrosis in IPF, as opposed to the resolution of fibrosis following acute injury in the  
457 mouse model. These findings highlight key challenges in translating animal models to human disease and  
458 suggest that the acute BLM mouse model might offer valuable insight into alveolar regeneration. Application  
459 of SRT to the repeat BLM instillation model<sup>61</sup>, in which a more persistent, senescent Krt8+ transitional alveolar  
460 cell state has been identified<sup>53</sup>, could provide more insights into disease progression in the IPF lung.

461 Our study illustrates the potential for spatial transcriptomics to deepen our understanding of IPF pathology  
462 and offers rich datasets to further probe the complex cellular interplay in lung fibrosis. This work provides  
463 resolution of key mechanisms underpinning IPF and proposes a divergent cellular trajectory towards arrested

464 regeneration in the human IPF lung, as a potential target for the discovery of novel disease modifying  
465 therapies.

466

## 467 **Methods**

### 468 **Experimental methods**

469 **Human lung tissues and ethics declaration.** IPF lung tissue was obtained from lung transplant patients.  
470 Human samples were acquired with approval by the local human research ethics committee (Gothenburg,  
471 Sweden; permit number 1026-15) and participants gave written informed consent prior to inclusion. Healthy  
472 lung tissue was obtained from deceased donors with no known lung disease, where samples were acquired  
473 with approval by the local human research ethics committee (Lund, Sweden; permit number Dnr 2016/317).  
474 All investigations were performed in accordance with the declaration of Helsinki.

475 All human tissues selected for analysis were collected from the peripheral lung. Fresh-frozen tissues were  
476 obtained from four HC subjects and from four IPF patients. For each IPF patient, three different tissues were  
477 collected representing areas of mild ("B1"), moderate ("B2") or severe ("B3") fibrosis within the same donor, as  
478 determined by histological inspection of H&E-stained samples.

479 **Mice and bleomycin challenge.** Female C57BL/6NCrl mice (Charles River, Germany) were 8 weeks old on  
480 the day of arrival at AstraZeneca R&D Gothenburg (Sweden). After an acclimatization period of 5 days, mice  
481 were challenged with 30  $\mu$ l bleomycin (Apollo Scientific, BI3543, Chemtronica Sweden; 40  $\mu$ g/mouse)  
482 dissolved in saline or saline via oropharyngeal route administration. Lung samples were collected at day 7 or  
483 day 21 following bleomycin challenge. The timepoints were selected to encompass the early phase of  
484 inflammation and tissue remodeling (d7), and the subsequent phase of established tissue damage (d21). The  
485 mice were housed in Macrolon III cages with poplar chips (Rettenmeier & Söhne) as bedding material,  
486 shredded paper, gnaw sticks and a paper house. They were kept in a facility with 12 h/12 h light/dark cycle at  
487  $21 \pm 1$  °C,  $55 \pm 15$  % relative humidity and had free access to food (R70, Lantmännen AB, Vadstena,  
488 Sweden) and tap water. Animal handling conformed to standards established by the Council of Europe  
489 ETS123 AppA, the Helsinki Convention for the Use and Care of Animals, Swedish legislation, and  
490 AstraZeneca global internal standards. All mouse experiments were approved by the Gothenburg Ethics  
491 Committee for Experimental Animals in Sweden and conformed to Directive 2010/63/EU. The present study  
492 was approved by the local Ethical committee in Gothenburg (EA000680-2017) and the approved site number  
493 is 31-5373/11.

494 **Mouse tissue collection.** Mice were anesthetized with isoflurane (5%, air flow  $\sim$ 2 L/min), placed on the  
495 operating table, and maintained with 3% isoflurane (air flow  $\sim$ 0.7 L/min). An incision was made in the skin  
496 from the middle of the stomach up to the chin. 0.1 mL heparin was injected through the diaphragm to the  
497 heart, and the abdomen aorta was cut to bleed the mice, followed by a cut in the apex of the heart. The heart  
498 and right lung lobes were tied off. The left lobes were collected and snap frozen for downstream analyses.  
499 The pulmonary circulation was perfused via the pulmonary artery with 0.8 mL 37°C saline followed by 0.6 mL  
500 37°C low-temperature melt agarose (SeaPlaque) solution. The lung was then inflated with 0.4-0.5 mL 37°C



501 low melt agarose solution via the trachea and tied off. The lung was collected and snap frozen in pre-chilled  
502 NaCl over dry-ice, and stored at -80C for further analyses.

503 **Generation of spatially resolved transcriptomics.** OCT-embedded human lung tissue-blocks and agarose-  
504 inflated mouse lung tissues were cryosectioned at 10  $\mu$ m (mouse) or 12  $\mu$ m (human) thickness with the  
505 cryostat temperature set to -20°C and -10°C (mouse) or -15°C (human) for the specimen head. For the human  
506 lung samples, RNA quality was estimated through total RNA extraction from 10 tissue sections with a RNeasy  
507 Plus Mini kit (Qiagen). Thereafter RNA integrity number (RIN) was measured using a 2100 Bioanalyzer  
508 Instrument (Agilent) and ranged between 5.4 and >8, except for one sample (IPF donor 2, B3) with a RIN of 3.  
509 Despite lower RIN values for some tissues, after taking histological integrity into account they were chosen to  
510 be included for further analysis. For the mouse sections, 10 sections were stored in -80°C prior to RNA  
511 extraction using the Rneasy micro kit (Qiagen). RNA quality was assessed using a 5300 Fragment Analyzer  
512 (Agilent) and the RIN values were >9 for all mouse samples.

513 The lung tissue samples were cryosectioned onto the Visium Gene Expression slide. All slides were stored at  
514 -80°C until further processing. Tissue fixation and staining followed the Methanol Fixation, H&E Staining, and  
515 Imaging Visium protocol (10X Genomics). Stained human lung sections were imaged using the Axio  
516 Imager.Z2 (ZEISS) light microscope at 20X magnification, and thereafter stitched using Vslide (MetaSystems).  
517 Mouse lung sections were imaged at 20X magnification using an Aperio Digital Pathology Slide Scanner  
518 (Leica Biosystems).

519 Sequencing libraries were prepared according to the Visium Spatial Gene Expression User Guide (10X  
520 Genomics, Rev C). The human tissue sections were permeabilized for 15 min and amplification of cDNA was  
521 performed with 15-17 cycles and indexing with 12-14 cycles. The mouse lung sections were permeabilized for  
522 15 min, and cDNA amplification and indexing were performed with 16-17 cycles and 8-15 cycles, respectively.  
523 Permeabilization times had been optimized prior to the experiments using the Visium Tissue Optimization kit.

524 The human sample libraries and the mouse sample libraries were pooled separately and sequenced. A 1%  
525 PhiX spike-in was included. The pooled libraries were loaded at 300pM onto a NovaSeq 6000 (Illumina)  
526 machine and sequenced on the S4 flowcell using the following set-up: Read1: 28 bp, Index 1: 10 bp, Index 2:  
527 10 bp, Read2: 90 bp. A total of 255-444 M reads (avg. 349 M) and 151-571 M reads (avg. 325 M) per sample  
528 were generated for human and mouse, respectively.

529 **Histopathology annotations.** Histopathological assessments were performed on the Visium H&E-stained  
530 tissue sections using the Loupe Browser (10X Genomics) software. The data was manually annotated into  
531 major tissue compartments based on tissue morphology. The human lung data was classified into “blood  
532 vessel”, “large airway”, “diseased (remodeled) tissue”, “fibroblastic foci / fibrous tissue”, “inflammation”, and  
533 “within normal limits” (alveolar), where “inflammation” was distinguished as areas with large aggregations of  
534 immune cells and “diseased tissue” largely corresponded to clearly recognizable changes in normal lung  
535 architecture. The “fibroblastic foci / fibrous tissue” was distinguished based on their microscopic appearance,  
536 characterized by the density and shape of nuclei present, and increased amounts of collagenous matrix,  
537 consistent with the appearance of the fibroblastic foci found in IPF lungs. The mouse data was categorized  
538 into similar groups of “blood vessel”, “large airway”, “within normal limits” (alveolar), “inflammation (d7)”,  
539 “inflammation (d21)”, and “suspect fibrosis / fibroplasia (d21)”. The areas annotated as “inflammation (d7)” in

540 lungs collected at day 7 were composed of both inflammatory and fibrotic tissue as they were  
541 indistinguishably mixed, while “inflammation (d21)” labelled dense immune cell aggregates. Thus, the spots  
542 labeled as both “inflammation (d7)” and “suspect fibrosis/fibroplasia (d21)” contains fibrotic tissue.

### 543 **Computational processing and analysis**

544 **Processing Visium sequencing data.** Raw human and mouse sequencing data FastQ files were processed  
545 using the Space Ranger 1.2.2 (10x Genomics) pipeline. Sequencing reads were mapped to their respective  
546 reference genomes GRCh38 (human) and mm10 (mouse). H&E images were manually aligned to the fiducial  
547 frame and tissue-covered spots were identified using the Loupe Browser (v.6, 10X Genomics) software.

548 **Mapping single cell types spatially with cell2location.** In the human samples, spatial deconvolution was  
549 performed using cell2location<sup>31</sup> against a previously published pulmonary fibrosis scRNA-seq dataset (GEO  
550 accession GSE135893)<sup>5</sup> (referred to as the *Habermann (2020)* dataset). The cell2location method uses  
551 signatures from the provided scRNA-seq data to infer absolute numbers (density) of cell types within each  
552 spatial spot. The single-cell regression model was trained with max\_epochs = 250 after selecting genes with  
553 parameters nonz\_mean\_cutoff = 1.25, cell\_count\_cutoff = 5, and cell\_percent\_cutoff = 0.05. The cell2location  
554 model was thereafter obtained with parameters max\_epochs = 10000, detection\_alpha = 20, and n = 7.

555 For the mouse data, a scRNA-seq dataset produced from the bleomycin-induced lung fibrosis mouse model  
556 collected at multiple time points (including d7 and d21) was used (GEO accession GSE141259)<sup>11</sup> (referred to  
557 as the *Strunz (2020)* dataset). For spatial deconvolution, we used max\_epochs = 400 for single-cell model  
558 generation using the parameters nonz\_mean\_cutoff = 1.10, cell\_count\_cutoff = 4, and cell\_percent\_cutoff =  
559 0.02 for gene selection. For model training, max\_epochs = 15000, detection\_alpha = 20, and n = 7 was  
560 applied.

561 **Downstream quality control and processing of Visium data.** Data filtering, processing, and analyses of  
562 the Visium data were performed in R (v.4.0.5) using the STUtility (v.1.1.1)<sup>62</sup> and Seurat (v.4.1.1)<sup>63</sup> packages.

563 For the human IPF and HC samples, spots under the tissue were selected for downstream analysis, and the  
564 data was imported into R using the STUtility function ‘InputFromTable’ where initial gene and spot data  
565 filtering was performed by setting the minimum UMI count per spot to 350, minimum UMI count per gene to  
566 100, minimum number of genes per spot to 10, and minimum number of spots per gene to 5. Spots were  
567 thereafter further filtered by content of mitochondria-associated genes, where spots with less than 30% was  
568 allowed, and content of blood contamination detected using hemoglobin gene expression, where spots < 30%  
569 were kept. Gene information was retrieved via biomaRt<sup>64</sup> and used to select for “protein coding”, “IG”  
570 (immunoglobulin), and “TR” (T cell receptor) gene biotypes, as well as to flag genes positioned on the X and Y  
571 chromosomes for removal to avoid gender biases in the analyses. Post-quality control, an average of 4,043  
572 spots per tissue section and across all sections was obtained, which yielded over 100,000 spots in total with  
573 data from over 15,000 genes for the human Visium dataset. Normalization and scaling of the data was  
574 performed using the ‘SCTransform’ function<sup>65</sup> (Seurat package), specifying sample ID and donor as variables  
575 to regress out, to remove the major effects of technical and interindividual differences.

576 Visium data generated from mouse lungs was filtered in a similar manner, apart from omitting the number of  
577 genes per spot (“minGenesPerSpot”) cutoff when loading the data using ‘InputFromTable’, and an adjusted

578 spot filtering for number of UMIs per spot set to 300. The final mouse Visium dataset included information of  
579 more than 15,000 genes in over 90,000 spots across all samples. ‘SCTransform’ was thereafter applied to the  
580 data, specifying the animal ID as a variable to regress out. All thresholds for filtering were set based on initial  
581 examination of the raw data to exclude low quality spots (or spots outside of tissue areas) and genes with low  
582 expression.

583 **Differential expression analysis on Visium pseudo-bulk data.** For initial differential gene expression  
584 analysis (DEA) between conditions, pseudo-bulk datasets were generated from the Visium gene count  
585 matrices. For the general condition comparison (HC vs IPF for human and vehicle control vs BLM d7 or d21  
586 for mouse), this was achieved by aggregating the raw counts per gene across all spots belonging to a donor  
587 or animal. Thereafter, DESeq2<sup>66</sup> was used for the differential gene testing by specifying “condition”, with  
588 “control” as reference, in the design. For the bulk comparison of fibrotic regions between IPF and BLM d7 or  
589 d21, pseudo-bulk data on a donor/animal level was obtained from the annotated tissue sections by pooling the  
590 counts from spots labelled as diseased (fibrotic, FF, remodeled, or inflamed (BML d7)) in the disease  
591 condition samples. Combined counts from the fibrotic regions were compared against the pseudo-bulk data  
592 from entire control samples using DESeq2 (with “condition” set as the design), for each species and/or  
593 timepoint separately. To compare results between species, orthogene<sup>67</sup> was used to identify mouse gene  
594 orthologues of the human genes, and the DESeq results were filtered to include only genes with available  
595 orthologues and present in all datasets (total of 12611 genes).

596 **Non-negative matrix factorization (NMF).** Deconvolution through NMF was applied to the Visium gene  
597 expression data using the ‘RunNMF’ function in STUtility. The factorization method decomposes the data into  
598 a set number of factors that are expressed as non-negative values (activity) within each data point (spot)  
599 along with a feature (gene) loading matrix, describing the contribution (weight) of each gene to the factors.  
600 The full human (HC and IPF) dataset was deconvolved into 30 factors (“hsNMF”), while the mouse data  
601 (vehicle control and BLM) was split by timepoint (d7, d21) before each subset was deconvolved into 30 factors  
602 (mmNMF<sub>d7</sub>, mmNMF<sub>d21</sub>). To describe each factor, functional enrichment analysis of the top 25 most  
603 contributing genes for each factor was performed using the ‘gost’ function in the gprofiler2 (v. 0.2.1) R  
604 package<sup>68</sup>, with the “hsapiens” (human) or “mmusculus” (mouse) organism specified. All factors were further  
605 annotated by examining the top contributing genes, the spatial localization of factor activity, and their  
606 abundance in different samples (diseased or control).

607 To compare hsNMF and mmNMF<sub>d21</sub> factors across species, the R package orthogene was first used for gene  
608 symbol conversion between human and mouse, and then the top 100 contributing genes for each factor was  
609 compared using Jaccard similarity index computation. Jaccard index was calculated as the intersection over  
610 the union of each gene set pair.

611 The distribution of each hsNMF factor within the human samples were estimated by counting the number of  
612 spots belonging to the 99<sup>th</sup> percentile of factor-active ( $F^{hi}$ ) spots and computing their frequency versus the total  
613 number of spots in each biopsy category (B0-3).

614 Spatial co-localization of factors and cell types was estimated by computing the pairwise Pearson correlation  
615 coefficient between spot factor activity and inferred cell type density. To identify donor variability in co-



616 localization, the human Visium data was split into groups of HC (all HC donors), IPF donor 1, IPF donor 2, IPF  
617 donor 3, and IPF donor 4, before computing the correlation scores.

618 The most active (99<sup>th</sup> quantile) hsNMF F14 spots (denoted F14<sup>hi</sup>) were subclustered by conducting a principal  
619 component (PC) analysis and using PCs 1-8 as inputs for 'FindNeighbors' and 'FindClusters' (resolution =  
620 0.4), which generated five clusters. The mmNMF<sub>d21</sub> F14<sup>hi</sup> spots were subclustered using the same approach,  
621 but with PCs 1-14 as input and clustering resolution set to 0.5, obtaining three clusters.

622 **Radial distance analysis.** Fluctuations in gene expression and cell type densities along a radial distance  
623 from the hsNMF F14<sup>hi</sup>C0 or mmNMF<sub>d21</sub> F14<sup>hi</sup>C0 regions (region of interest; ROI) were computed. The  
624 distance information from each section containing the ROI was extracted using the *semIa* R package<sup>69</sup> (v.  
625 1.1.6; R v. 4.2.3; Seurat v. 4.3.0.1) with the 'RadialDistance' function, where singletons were excluded in the  
626 human analysis. In the human IPF data, distance correlation coefficients were computed for the 1000 most  
627 variable genes at a 500  $\mu$ m distance from the ROI border using Pearson correlation. P-values were corrected  
628 using the Benjamini-Hochberg (BH) method and used to filter for significant (adj.  $p < 0.01$ ) genes. Cell type  
629 density correlation was obtained using Pearson correlation and BH-corrected p-values at a radial distance of  
630 500  $\mu$ m. Since a linear relationship may not be present in all cases, cell density and gene expression  
631 fluctuation as a function of radial distance was visualized using the 'geom\_smooth' function (ggplot2) with  
632 method set to "gam" (generalized additive model) and formula "y ~ s(x, bs = 'cs')". For the mouse BLM d21  
633 data, the cell type density across radial distance from the ROI was visualized using 'geom\_smooth' with the  
634 "loess" (Locally Estimated Scatterplot Smoothing) method.

635 **IPF fibrotic niche regulators and cell-cell communication.** In the human IPF Visium data, the  
636 microenvironment surrounding hsNMF F14<sup>hi</sup>C0 spots was investigated by first identifying the nearest  
637 neighbors (using the 'RegionNeighbours' STUtility function) over two rounds, thereby including spots located  $\leq$   
638 2 spot distances from hsNMF F14<sup>hi</sup>C0. Next, the selected neighboring (nb.) spots were clustered by first  
639 running PCA and then using PC 1-9 as input for 'FindNeighbors' and thereafter 'FindClusters' (resolution =  
640 0.2), obtaining 6 clusters (nb. clusters 0-5). Marker genes were identified using 'FindAllMarkers' on the  
641 neighboring spot data subset and comparing each cluster against the remaining clusters. Due to their low  
642 abundancies, nb. clusters 3-5 were omitted in some of the downstream analyses.

643 Upstream regulators and active pathways for the nb. clusters (0-2) were predicted with Ingenuity Pathway  
644 Analysis (IPA; version 90348151, Ingenuity Systems, Qiagen), using the cluster marker gene lists (adj.  $p <$   
645 0.01). As a reference, marker genes for the hsNMF F14<sup>hi</sup>C0 cluster was also included in the analysis. These  
646 markers were generated by comparing hsNMF F14<sup>hi</sup>C0 spots against all other spots in the IPF Visium subset,  
647 using 'FindMarkers' with arguments "min.pct = 0.25" and "min.diff.pct = 0.1". The output was thereafter  
648 compared using the R package multiTenichjam (v. 0.0.72.900)<sup>70</sup> and the top 20 upstream regulators and top  
649 10 enriched pathways and diseases/functions were plotted.

650 Directional cell-cell communication analysis was employed within the spatially constrained nb. clusters using  
651 NicheNet (v. 1.1.1)<sup>44</sup>, a method in which ligand-target links are predicted using gene expression and a prior  
652 model that incorporates intracellular signaling. Information containing ligand-receptor interactions  
653 ("lr\_network.rds"), ligand-target gene regulatory potential scores ("ligand\_target\_matrix.rds"), and weighted  
654 ligand-signaling and gene regulatory network ("weighted\_networks.rds") were retrieved from the NicheNet

655 data repository (DOI: 10.5281/zenodo.3260758). Analyses were performed in four rounds based on which  
656 cluster(s) were specified as receiver and sender populations, 1) receiver: F14<sup>hi</sup>C0, senders: nb. clusters 0-5,  
657 2) receiver: nb. cluster 0, sender: F14<sup>hi</sup>C0, 3) receiver: nb. cluster 1, sender: F14<sup>hi</sup>C0, and 4) receiver: nb.  
658 cluster 2, sender: F14<sup>hi</sup>C0. In all rounds, receiver genes were identified by setting the condition reference as  
659 data from all other spots not included in the analysis (of IPF and HC origin). The results from all four analyses  
660 were compiled and the top prioritized ligands (avg. correlation value > 0.075) sorted based on the round 1  
661 results were used to visualize the corresponding results in the other analysis rounds and the gene expression  
662 levels across all selected clusters.

663 **Spatial cell type compartmentalization in mouse.** Cell type co-localization compartments were identified in  
664 the mouse Visium data using the Strunz (2020) cell2location results. Cell types annotated as “NA” and  
665 “low.quality.cells” were excluded and the Visium spot data was subset into groups of vehicle (d7 and d21),  
666 BLM d7, and BLM d21, before pair-wise correlations (Pearson) for each cell type across all spots within each  
667 subset were computed. Hierarchical clustering was performed, and compartments were defined based on a  
668 generally applied tree height (*h*) cut-off of 1.5. A Sankey diagram was drawn based on the cell types falling  
669 into each compartment for each data subset. To visualize the spatial localization of the BLM d21  
670 compartments F, H, and G, spot-wise compartment scores were computed by summing the inferred cell type  
671 densities for all cell types belonging to each compartment.

672 **Translational analyses of human and mouse aberrant basaloid clusters in a shared gene-space.**  
673 Selected IPF and BLM d21 samples were chosen for the integrated analysis (IPF 3 B1-B3, IPF 4 B1-B3, BLM  
674 d21 animals 1-5), based on having more pronounced fibrosis and presence of identified AbBa cell-dense  
675 regions. Raw count data were filtered to include only genes with orthologous name conversions, identified by  
676 orthogene<sup>67</sup>. Subsequently, a new assay was created from this filtered data for separate normalization of  
677 human and mouse datasets. The two data sets were then integrated based on the shared genes using the  
678 anchor integration approach in Seurat (‘FindIntegrationAnchors’ followed by ‘IntegrateData’. Default  
679 parameters), with specified anchor features identified using ‘SelectIntegrationFeatures’. Marker genes for the  
680 hsNMF F14<sup>hi</sup>C0 or mmNMF<sub>d21</sub> F14<sup>hi</sup>C0 clusters were thereafter identified separately with ‘FindMarkers’ and  
681 comparing against all other same-species spots, using the integrated genes.

682 The identified hsNMF F14<sup>hi</sup>C0 and mmNMF<sub>d21</sub> F14<sup>hi</sup>C0 marker genes (Bonferroni adj.  $p < 0.05$ ) were analyzed  
683 for upstream regulator and canonical pathway enrichment prediction in IPA. Results were compared across  
684 species using the R package multienrichjam (v.0.0.72.900)<sup>70</sup> to pinpoint shared and unique upstream  
685 regulators and pathways. The most significant regulators ( $p$  value <  $10^{-7}$ , right-tailed Fisher's exact test) and  
686 pathways ( $p$  value <  $10^{-4}$ ) were visualized in clustered network (cnet) plots, which groups predicted molecules  
687 into clusters (“Nodes”), based on shared contributing marker genes.

688 **Lymphocyte aggregate comparison.** The human IPF Visium data was split based on donor, and processed  
689 separately by running SCTransform() and NMF, producing 30 new and more refined subject-specific factors  
690 for each IPF donor. Examining the spatial factor activity and gene contribution, it was possible to identify one  
691 factor for IPF donors 1-3 that corresponded to histological findings of lymphocyte aggregates. For IPF donor 4,  
692 no corresponding factor could be identified. The selected factors that exhibited a signature for dense  
693 lymphocyte accumulations were factors 10 (IPF donor 1), 15 (IPF donor 2), and 17 (IPF donor 3). For the

694 mouse data, the NMF results produced for each time point was used, and factors 11 (day 7) and 12 (day 21)  
695 were identified as corresponding to tertiary structure-like (TLS-like) features. In the mouse day 21 NMF  
696 analysis, we moreover identified factor 13 adjacent to the activity of NMF<sub>d21</sub> factor 12.

697 The top 100 most contributing genes for each of the identified factors were selected and their gene loadings  
698 were scaled between 0 and 1 (each factor separately). Only genes which were found to have orthologous  
699 gene names in both species (based on conversion using ‘orthogene’) were selected, and to reduce the set of  
700 genes for the visualization in Fig. 6b, genes with a summed scaled loading of > 0.5 were used.

701 Cell densities and detection rates were estimated in the spots with the highest (99<sup>th</sup> percentile) factor activity.  
702 The inferred cell type densities produced using cell2location with the Habermann et al. (human)<sup>5</sup> and Strunz et  
703 al. (mouse)<sup>11</sup> datasets were used. All immune cell types were selected for evaluation, however, for mouse, the  
704 following cell types were excluded from the visualization as they did not exhibit a relevant signal and lacked  
705 comparable human cell types: “AM (BLM)”, “AM (PBS)”, “Non classical monocytes (Ly6c2-)”, “Fn1+  
706 macrophages”, “M2 macrophages”, “Themis T cells”, and “T cell subset”. For each subject, the average cell  
707 density was measured as the average inferred cell density among the selected spots and the detection rate  
708 was calculated as the percentage of spots displaying a density score higher than 0.5.

709 **Spatial cell co-localization trajectory analysis.** Cell type densities, inferred using the Habermann (human  
710 IPF) or Strunz (mouse BLM) scRNA-seq datasets, for “AT2 cells”, “Activated AT2 cells”, “Krt8+ADI”, and “AT1  
711 cells” (mouse) or “AT2”, “Transitional AT2”, “KRT5-/KRT17+”, “AT1” (human) were used. Spots with the  
712 highest abundancies (95<sup>th</sup> percentile) of these cell types were selected and used as input for dimensionality  
713 reduction with UMAP (n.neighbors = 30, min.dist = 0.1, for both the mouse and human analyses). In parallel,  
714 the cell type densities were used to produce low resolution clusters using ‘FindNeighbors’ and ‘FindClusters’  
715 (mouse: resolution = 0.2, human: resolution = 0.1), to identify a cluster that corresponded to the AT2-dense  
716 spots (AT2-cluster). Trajectory analyses using the Slingshot approach<sup>71</sup> (v. 1.8) were then applied to each set  
717 of UMAP spot embeddings with the ‘getLineages’ function and assigning the AT2-clusters as starting points.  
718 Curves were extrapolated using ‘getCurves’ (approx\_points = 300, thresh = 0.01, stretch = 0.8, allow.breaks =  
719 FALSE, shrink = 0.99), and thereafter visualized on top of the UMAP embeddings. Pseudo-time was  
720 estimated by passing filtered gene count data (genes detected (>5 transcripts) in at least 1% of the total  
721 number of spots) and Slingshot curves into a Negative Binomial Generalized Additive Model using the  
722 ‘fitGAM’ function from the tradeSeq R package (v. 1.4.0)<sup>72</sup>. In the human data, two curves were identified, and  
723 the visualized pseudo-time is the max value of the two pseudo-time curves.

## 724 **Acknowledgements**

725 We sincerely thank the patients that donated lung samples, making this research possible. We further thank  
726 E. Sand for assistance with tissue sectioning and staining, G. Hamm for providing support on mouse lung  
727 tissue preparation, and S. Bates for running quality measurements on the mouse tissue. This work was  
728 financially supported by the Swedish Foundation for Strategic Research.

729



## 730 Author contributions

731 J.H., M.S., A.O., G.B., S.J., P.L.S, and J.L., conceived the study; L.F., M.O.L., S.J, and M.S. planned and  
732 designed the experiments; T.V. and A.B. provided animals from the bleomycin mouse model; A.C., S.O., and  
733 M.O.L. collected the mouse lung tissue; S.J. and L.F identified and selected the human tissues; L.F. and  
734 M.O.L. carried out tissue sectioning and spatial gene expression experiments; J. Lindgren and M.O.L.  
735 sequenced the samples; L.S. performed histopathological annotations; B.K. processed the raw Visium data  
736 and performed cell type deconvolution; L.F. and M.O.L carried out computational analyses of the Visium data;  
737 Data interpretation by M.O.L., L.F., M.H., V.P., M.S., A.O., P.L.S., and J.H.; M.S., P.L.S., J.H., and A.O.  
738 supervised the project; L.F. created the final figures and illustrations; M.O.L. and L.F. drafted the manuscript  
739 with input from M.H., V.P., M.S., A.O., P.L.S., L.S., G.B., T.V., S.J., and J.H; All authors read and approved  
740 the manuscript.

## 741 Competing interests

742 P.L.S. and J.L. are scientific consultants to 10x Genomics. All other authors are employees at AstraZeneca  
743 and may hold shares in the company.

744

## 745 References

- 746 1. Richeldi, L., Collard, H.R. & Jones, M.G. Idiopathic pulmonary fibrosis. *Lancet* **389**, 1941-1952 (2017).
- 747 2. Spagnolo, P. *et al.* Idiopathic pulmonary fibrosis: Disease mechanisms and drug development.  
748 *Pharmacol Ther* **222**, 107798 (2021).
- 749 3. Mei, Q., Liu, Z., Zuo, H., Yang, Z. & Qu, J. Idiopathic Pulmonary Fibrosis: An Update on  
750 Pathogenesis. *Front Pharmacol* **12**, 797292 (2021).
- 751 4. Adams, T.S. *et al.* Single-cell RNA-seq reveals ectopic and aberrant lung-resident cell populations in  
752 idiopathic pulmonary fibrosis. *Sci Adv* **6**, eaba1983 (2020).
- 753 5. Habermann, A.C. *et al.* Single-cell RNA sequencing reveals profibrotic roles of distinct epithelial and  
754 mesenchymal lineages in pulmonary fibrosis. *Sci Adv* **6**, eaba1972 (2020).
- 755 6. Morse, C. *et al.* Proliferating SPP1/MERTK-expressing macrophages in idiopathic pulmonary fibrosis.  
756 *Eur Respir J* **54**(2019).
- 757 7. Reyfman, P.A. *et al.* Single-Cell Transcriptomic Analysis of Human Lung Provides Insights into the  
758 Pathobiology of Pulmonary Fibrosis. *Am J Respir Crit Care Med* **199**, 1517-1536 (2019).
- 759 8. Melms, J.C. *et al.* A molecular single-cell lung atlas of lethal COVID-19. *Nature* **595**, 114-119 (2021).
- 760 9. Kathiriya, J.J. *et al.* Human alveolar type 2 epithelium transdifferentiates into metaplastic KRT5(+)  
761 basal cells. *Nat Cell Biol* **24**, 10-23 (2022).
- 762 10. Ptasinski, V. *et al.* Modeling fibrotic alveolar transitional cells with pluripotent stem cell-derived  
763 alveolar organoids. *Life Sci Alliance* **6**(2023).
- 764 11. Strunz, M. *et al.* Alveolar regeneration through a Krt8+ transitional stem cell state that persists in  
765 human lung fibrosis. *Nat Commun* **11**, 3559 (2020).
- 766 12. Choi, J. *et al.* Inflammatory Signals Induce AT2 Cell-Derived Damage-Associated Transient  
767 Progenitors that Mediate Alveolar Regeneration. *Cell Stem Cell* **27**, 366-382.e7 (2020).
- 768 13. Kobayashi, Y. *et al.* Persistence of a regeneration-associated, transitional alveolar epithelial cell state  
769 in pulmonary fibrosis. *Nat Cell Biol* **22**, 934-946 (2020).
- 770 14. Degryse, A.L. *et al.* Repetitive intratracheal bleomycin models several features of idiopathic  
771 pulmonary fibrosis. *Am J Physiol Lung Cell Mol Physiol* **299**, L442-52 (2010).
- 772 15. Jenkins, R.G. *et al.* An Official American Thoracic Society Workshop Report: Use of Animal Models  
773 for the Preclinical Assessment of Potential Therapies for Pulmonary Fibrosis. *Am J Respir Cell Mol*  
774 *Biol* **56**, 667-679 (2017).
- 775 16. Kadur Lakshminarasimha Murthy, P. *et al.* Human distal lung maps and lineage hierarchies reveal a  
776 bipotent progenitor. *Nature* **604**, 111-119 (2022).

- 777 17. Sikkema, L. *et al.* An integrated cell atlas of the lung in health and disease. *Nat Med* **29**, 1563-1577  
778 (2023).
- 779 18. Heinzelmann, K. *et al.* Single-cell RNA sequencing identifies G-protein coupled receptor 87 as a basal  
780 cell marker expressed in distal honeycomb cysts in idiopathic pulmonary fibrosis. *Eur Respir J*  
781 **59**(2022).
- 782 19. Fu, X. *et al.* Polony gels enable amplifiable DNA stamping and spatial transcriptomics of chronic pain.  
783 *Cell* **185**, 4621-4633.e17 (2022).
- 784 20. Liu, Y. *et al.* High-Spatial-Resolution Multi-Omics Sequencing via Deterministic Barcoding in Tissue.  
785 *Cell* **183**, 1665-1681.e18 (2020).
- 786 21. Rodrigues, S.G. *et al.* Slide-seq: A scalable technology for measuring genome-wide expression at  
787 high spatial resolution. *Science* **363**, 1463-1467 (2019).
- 788 22. Ståhl, P.L. *et al.* Visualization and analysis of gene expression in tissue sections by spatial  
789 transcriptomics. *Science* **353**, 78-82 (2016).
- 790 23. Eyres, M. *et al.* Spatially resolved deconvolution of the fibrotic niche in lung fibrosis. *Cell Rep* **40**,  
791 111230 (2022).
- 792 24. Guillotin, D. *et al.* Transcriptome analysis of IPF fibroblastic foci identifies key pathways involved in  
793 fibrogenesis. *Thorax* **76**, 73-82 (2021).
- 794 25. Blumhagen, R.Z. *et al.* Spatially distinct molecular patterns of gene expression in idiopathic  
795 pulmonary fibrosis. *Respir Res* **24**, 287 (2023).
- 796 26. Hanmandlu, A. *et al.* Transcriptomic and Epigenetic Profiling of Fibroblasts in Idiopathic Pulmonary  
797 Fibrosis. *Am J Respir Cell Mol Biol* **66**, 53-63 (2022).
- 798 27. Pardo, A., Cabrera, S., Maldonado, M. & Selman, M. Role of matrix metalloproteinases in the  
799 pathogenesis of idiopathic pulmonary fibrosis. *Respir Res* **17**, 23 (2016).
- 800 28. Frangogiannis, N. Transforming growth factor- $\beta$  in tissue fibrosis. *J Exp Med* **217**, e20190103 (2020).
- 801 29. Piersma, B., Bank, R.A. & Boersema, M. Signaling in Fibrosis: TGF- $\beta$ , WNT, and YAP/TAZ Converge.  
802 *Front Med (Lausanne)* **2**, 59 (2015).
- 803 30. Lin, X. & Boutros, P.C. Optimization and expansion of non-negative matrix factorization. *BMC*  
804 *Bioinformatics* **21**, 7 (2020).
- 805 31. Kleshchevnikov, V. *et al.* Cell2location maps fine-grained cell types in spatial transcriptomics. *Nat*  
806 *Biotechnol* **40**, 661-671 (2022).
- 807 32. Zuo, W.L. *et al.* Dysregulation of club cell biology in idiopathic pulmonary fibrosis. *PLoS One* **15**,  
808 e0237529 (2020).
- 809 33. Seibold, M.A. *et al.* A common MUC5B promoter polymorphism and pulmonary fibrosis. *N Engl J Med*  
810 **364**, 1503-12 (2011).
- 811 34. Herrera, J.A. *et al.* The UIP/IPF fibroblastic focus is a collagen biosynthesis factory embedded in a  
812 distinct extracellular matrix. *JCI Insight* **7**(2022).
- 813 35. Yamaguchi, M. *et al.* Fibroblastic foci, covered with alveolar epithelia exhibiting epithelial-  
814 mesenchymal transition, destroy alveolar septa by disrupting blood flow in idiopathic pulmonary  
815 fibrosis. *Lab Invest* **97**, 232-242 (2017).
- 816 36. Ye, Z. & Hu, Y. TGF- $\beta$ 1: Gentlemanly orchestrator in idiopathic pulmonary fibrosis (Review). *Int J Mol*  
817 *Med* **48**(2021).
- 818 37. Riemondy, K.A. *et al.* Single cell RNA sequencing identifies TGF $\beta$  as a key regenerative cue following  
819 LPS-induced lung injury. *JCI Insight* **5**(2019).
- 820 38. Gau, D. & Roy, P. SRF'ing and SAP'ing - the role of MRTF proteins in cell migration. *J Cell Sci*  
821 **131**(2018).
- 822 39. Lin, K.C., Park, H.W. & Guan, K.L. Regulation of the Hippo Pathway Transcription Factor TEAD.  
823 *Trends Biochem Sci* **42**, 862-872 (2017).
- 824 40. Park, H.W. *et al.* Alternative Wnt Signaling Activates YAP/TAZ. *Cell* **162**, 780-94 (2015).
- 825 41. Speight, P., Kofler, M., Szász, K. & Kapus, A. Context-dependent switch in  
826 chemo/mechanotransduction via multilevel crosstalk among cytoskeleton-regulated MRTF and TAZ  
827 and TGF $\beta$ -regulated Smad3. *Nat Commun* **7**, 11642 (2016).
- 828 42. Zheng, Y. & Pan, D. The Hippo Signaling Pathway in Development and Disease. *Dev Cell* **50**, 264-  
829 282 (2019).
- 830 43. González-Amor, M., Dorado, B. & Andrés, V. Emerging roles of interferon-stimulated gene-15 in age-  
831 related telomere attrition, the DNA damage response, and cardiovascular disease. *Front Cell Dev Biol*  
832 **11**, 1128594 (2023).
- 833 44. Browaeyns, R., Saelens, W. & Saeys, Y. NicheNet: modeling intercellular communication by linking  
834 ligands to target genes. *Nat Methods* **17**, 159-162 (2020).
- 835 45. Cui, H. *et al.* Monocyte-derived alveolar macrophage apolipoprotein E participates in pulmonary  
836 fibrosis resolution. *JCI Insight* **5**(2020).

- 837 46. Zheng, P. *et al.* Tumor-associated macrophages-derived exosomes promote the migration of gastric  
838 cancer cells by transfer of functional Apolipoprotein E. *Cell Death Dis* **9**, 434 (2018).
- 839 47. Nishimura, M. *et al.* Extracellular cleavage of collagen XVII is essential for correct cutaneous  
840 basement membrane formation. *Hum Mol Genet* **25**, 328-39 (2016).
- 841 48. Bazan, J.F. *et al.* A new class of membrane-bound chemokine with a CX3C motif. *Nature* **385**, 640-4  
842 (1997).
- 843 49. Jin, Q., Chen, H., Luo, A., Ding, F. & Liu, Z. S100A14 stimulates cell proliferation and induces cell  
844 apoptosis at different concentrations via receptor for advanced glycation end products (RAGE). *PLoS*  
845 *One* **6**, e19375 (2011).
- 846 50. Somia, N.V. *et al.* LFG: an anti-apoptotic gene that provides protection from Fas-mediated cell death.  
847 *Proc Natl Acad Sci U S A* **96**, 12667-72 (1999).
- 848 51. Elston, R. & Inman, G.J. Crosstalk between p53 and TGF- $\beta$  Signalling. *J Signal Transduct* **2012**,  
849 294097 (2012).
- 850 52. Hata, A. & Chen, Y.G. TGF- $\beta$  Signaling from Receptors to Smads. *Cold Spring Harb Perspect Biol*  
851 **8**(2016).
- 852 53. Wang, F. *et al.* Regulation of epithelial transitional states in murine and human pulmonary fibrosis. *J*  
853 *Clin Invest* **133**(2023).
- 854 54. Liu, J. *et al.* CTHRC1+ fibroblasts are stimulated by macrophage-secreted SPP1 to induce excessive  
855 collagen deposition in keloids. *Clin Transl Med* **12**, e1115 (2022).
- 856 55. Shin, J.S. *et al.* Surface expression of MHC class II in dendritic cells is controlled by regulated  
857 ubiquitination. *Nature* **444**, 115-8 (2006).
- 858 56. Ansel, K.M. *et al.* A chemokine-driven positive feedback loop organizes lymphoid follicles. *Nature* **406**,  
859 309-14 (2000).
- 860 57. Madisson, E. *et al.* A spatially resolved atlas of the human lung characterizes a gland-associated  
861 immune niche. *Nat Genet* **55**, 66-77 (2023).
- 862 58. Schmierer, B. & Hill, C.S. TGFbeta-SMAD signal transduction: molecular specificity and functional  
863 flexibility. *Nat Rev Mol Cell Biol* **8**, 970-82 (2007).
- 864 59. Nascimento, J.C.R. *et al.* Impact of apolipoprotein E genetic polymorphisms on liver disease: An  
865 essential review. *Ann Hepatol* **19**, 24-30 (2020).
- 866 60. Nishimura, K. *et al.* Dual disruption of eNOS and ApoE gene accelerates kidney fibrosis and  
867 senescence after injury. *Biochem Biophys Res Commun* **556**, 142-148 (2021).
- 868 61. Redente, E.F. *et al.* Persistent, Progressive Pulmonary Fibrosis and Epithelial Remodeling in Mice.  
869 *Am J Respir Cell Mol Biol* **64**, 669-676 (2021).
- 870 62. Bergenstrahle, J., Larsson, L. & Lundeberg, J. Seamless integration of image and molecular analysis  
871 for spatial transcriptomics workflows. *BMC Genomics* **21**, 482 (2020).
- 872 63. Stuart, T. *et al.* Comprehensive Integration of Single-Cell Data. *Cell* **177**, 1888-1902.e21 (2019).
- 873 64. Smedley, D. *et al.* BioMart--biological queries made easy. *BMC Genomics* **10**, 22 (2009).
- 874 65. Hafemeister, C. & Satija, R. Normalization and variance stabilization of single-cell RNA-seq data  
875 using regularized negative binomial regression. *Genome Biol* **20**, 296 (2019).
- 876 66. Love, M.I., Huber, W. & Anders, S. Moderated estimation of fold change and dispersion for RNA-seq  
877 data with DESeq2. *Genome Biol* **15**, 550 (2014).
- 878 67. Schilder, B. Orthogene: an R package for easy mapping of orthologous genes across hundreds of  
879 species. Vol. 2023.
- 880 68. Kolberg, L., Raudvere, U., Kuzmin, I., Vilo, J. & Peterson, H. gprofiler2 -- an R package for gene list  
881 functional enrichment analysis and namespace conversion toolset g:Profiler. *F1000Res* **9**(2020).
- 882 69. Larsson, L., Franzén, L., Stahl, P.L. & Lundeberg, J. Semla: a versatile toolkit for spatially resolved  
883 transcriptomics analysis and visualization. *Bioinformatics* **39**(2023).
- 884 70. Ward, J.M. MultiEnrichjam: Analysis and Visualization of Multiple Gene Set Enrichments. Vol. 2023 R  
885 package version 0.0.72.900.
- 886 71. Street, K. *et al.* Slingshot: cell lineage and pseudotime inference for single-cell transcriptomics. *BMC*  
887 *Genomics* **19**, 477 (2018).
- 888 72. Van den Berge, K. *et al.* Trajectory-based differential expression analysis for single-cell sequencing  
889 data. *Nat Commun* **11**, 1201 (2020).

890
